1 **High throughput screening and identification of coagulopathic snake venom proteins and**  
2 **peptides using nanofractionation and proteomics approaches**

3

4 Julien Slagboom<sup>a,b</sup>, Marija Mladić<sup>c</sup>, Chunfang Xie<sup>b</sup>, Freek Vonk<sup>d</sup>, Govert W. Somsen<sup>b</sup>, Nicholas  
5 R. Casewell<sup>a</sup>, Jeroen Kool<sup>b</sup>

6 <sup>a</sup>Centre for Snakebite Research & Interventions, Liverpool School of Tropical Medicine,  
7 Liverpool, UK

8 <sup>b</sup>Division of BioAnalytical Chemistry, Amsterdam Institute for Molecules Medicines and Systems,  
9 VU University Amsterdam, Amsterdam, The Netherlands

10 <sup>c</sup>Animal Sciences and Health, Institute of Biology Leiden, Leiden University, Leiden, The  
11 Netherlands

12 <sup>d</sup>Naturalis Biodiversity Center, Leiden, The Netherlands

13 \*Corresponding author [j.kool@vu.nl](mailto:j.kool@vu.nl)

14

15

16 Abstract

17 Snakebite is a neglected tropical disease that results in a variety of systemic and local pathologies in  
18 envenomed victims and is responsible for around 138,000 deaths every year. Many snake venoms cause  
19 severe coagulopathy that makes victims vulnerable to suffering life-threatening haemorrhage. The  
20 mechanisms of action of coagulopathic snake venom toxins are diverse and can result in both anticoagulant  
21 and procoagulant effects. However, because snake venoms consist of a mixture of numerous protein and  
22 peptide components, high throughput characterizations of specific target bioactives is challenging. In this  
23 study, we applied a combination of analytical and pharmacological methods to identify snake venom toxins  
24 from a wide diversity of snake species that perturb coagulation. To do so, we used a high-throughput  
25 screening approach consisting of a miniaturised plasma coagulation assay in combination with a venom  
26 nanofractionation approach. Twenty snake venoms were first separated using reversed-phase liquid  
27 chromatography, and a post-column split allowed a small fraction to be analyzed with mass spectrometry,  
28 while the larger fraction was collected and dispensed onto 384-well plates before direct analysis using a  
29 plasma coagulation assay. Our results demonstrate that many snake venoms simultaneously contain both  
30 procoagulant and anticoagulant bioactives that contribute to coagulopathy. In-depth identification analysis  
31 from seven medically-important venoms, via mass spectrometry and nanoLC-MS/MS, revealed that  
32 phospholipase A<sub>2</sub> toxins are frequently identified in anticoagulant venom fractions, while serine protease  
33 and metalloproteinase toxins are often associated with procoagulant bioactivities. The nanofractionation  
34 and proteomics approach applied herein seems likely to be a valuable tool for the rational development of  
35 next-generation snakebite treatments by facilitating the rapid identification and fractionation of  
36 coagulopathic toxins, thereby enabling specific targeting of these toxins by new therapeutics such as  
37 monoclonal antibodies and small molecule inhibitors.

39 Author summary

40 Snakebite is a neglected tropical disease that results in more than 100,000 deaths every year.  
41 Haemotoxicity is one of the most common signs of systemic envenoming observed after snakebite, and  
42 many snake venoms cause severe impairment of the blood coagulation that makes victims vulnerable to  
43 suffering life-threatening hemorrhage. In this study, we applied a combination of analytical and  
44 pharmacological methods to identify snake venom toxins from a wide diversity of snake species that  
45 interfere with blood coagulation. Twenty snake venoms were screened for their effects on the blood  
46 coagulation cascade and based on the initial results and the medical relevance of the species, seven  
47 venoms were selected for in-depth analysis of the responsible toxins using advanced identification  
48 techniques. Our findings reveal a number of anticoagulant toxins that have not yet been reported before as  
49 such. The methodology described herein not only enables the identification of both known and unknown  
50 toxins that cause impairment of the blood coagulation, but offers a throughput platform to effectively screen  
51 for inhibitory molecules relevant for the development of next generation snakebite treatments.

52 **1. Introduction**

53 Snakebite is a medically important neglected tropical disease, with up to 5.5 million people bitten annually  
54 (1). These bites result in as many as 1.8 million envenomings and 138,000 deaths each year, with three to  
55 five times that number of people said to suffer from long term morbidity (1-4). It is the rural poor agricultural  
56 workers (e.g. farmers, herdsman, etc) of the tropics and sub-tropics who suffer the greatest burden of  
57 snakebite, with incidences and case fatality rates highest in south and south-east Asia and sub-Saharan  
58 Africa (1). In part this is due to socioeconomic reasons, as victims in these parts of the world often do not  
59 have rapid access to specialized medical care due to limited health and logistical infrastructure (5), which  
60 severely restricts access to snakebite therapy. The only specific therapy available for treating snake  
61 envenoming is antivenom. Antivenom comprises polyclonal antibodies, which are purified from the blood of  
62 horses or sheep immunised with small, sub-toxic, amounts of snake venom. A proportion of the resulting  
63 IgG antibodies are specific to the venom toxins used for immunisation, and thus rapidly neutralize their  
64 activity when these therapies are delivered intravenously to patients, particularly if treatment occurs soon  
65 after a bite. However, despite these products saving thousands of lives every year, they possess a number  
66 of technical limitations that ultimately restrict their clinical utility. Antivenoms exhibit limited paraspecific  
67 efficacy (with efficacy restricted mostly to the species used for immunisation), have poor dose efficacy (only  
68 10-20% of antivenom antibodies are typically specific to the toxin immunogens) and exhibit high incidences  
69 of adverse effects (which can be as high as in 75% of cases) (6-8). Critically, these therapies are expensive,  
70 ranging from \$50-350 per vial in Africa, for example (6). Often, treating a snakebite can require multiple vial  
71 (e.g. up to 10-20), which makes these therapies unaffordable to the majority of snakebite victims, and  
72 pushes those individuals further into poverty. The consequences are poor uptake of this product, weak  
73 demand, a lack of manufacturing incentive, and a cycle of undersupply of affordable efficacious antivenom  
74 to the regions where it is needed most (9). Consequently, the development of alternative low-cost, low dose,  
75 safe and paraspecifically efficacious antivenoms would be of great benefit to snakebite victims inhabiting  
76 impoverished regions of the world (10).

77 Snake venoms consist of a mixture of different protein and peptides that are used to kill, immobilise or  
78 incapacitate their prey (11). These 'toxins' vary at every taxonomic level and cause a range of different

79 toxicities, including haemotoxic, neurotoxic and/or cytotoxic pathologies (12-14). The majority of snakebite  
80 deaths are thought to be caused by snakes whose venoms are predominately haemotoxic, usually resulting  
81 in haemorrhage and perturbations of the clotting cascade. Indeed, venom induced consumption  
82 coagulopathy (VICC) is said to be one of the most medically important pathologies caused by snakebite, as  
83 it leaves patients highly vulnerable to life-threatening haemorrhage (15). VICC is caused by the continual  
84 activation of the clotting pathway via procoagulant toxins present in snake venom, ultimately leading to a  
85 depletion of clotting factors (particularly fibrinogen) via their consumption, and incoagulable blood [4]. The  
86 majority of snake species that are known to cause VICC are vipers, however, certain Australian elapid  
87 snakes, and a small number of colubrid and natricine snakes from Africa and Asia have also been reported  
88 to possess procoagulant toxins capable of causing VICC in snakebite victims (7, 15).

89 Although there are a number of different toxins responsible for causing VICC, many are thought to be  
90 members of the snake venom serine protease (SVSPs) and snake venom metalloproteinase (SVMPs) toxin  
91 families (5). These toxins activate the blood clotting cascade via their activity on a variety of different clotting  
92 factors, of which several are found towards the end of the clotting cascade, including factor V, factor X and  
93 prothrombin (factor II). In the same venom, it is not uncommon for other toxins to directly target fibrinogen,  
94 resulting in either its degradation or the promotion of weak fibrin clots (7, 11, 15). In addition to procoagulant  
95 toxins, snake venoms have also been reported to contain proteins with anticoagulant properties, such as  
96 phospholipases A<sub>2</sub>s (PLA<sub>2</sub>s) and C-type lectin-like proteins (16-18). As mentioned earlier, venom variation  
97 is ubiquitous among snake species, and thus the different snake species that cause VICC are thought to  
98 have differing numbers of pro- and anti-coagulant toxins in their venom, which may target different  
99 components of the blood clotting cascade, even if the pathological outcome in a victim (e.g. VICC) is the  
100 same. This variation of venom constituents makes it particularly challenging to develop generic antivenom  
101 that could be used to treat snakebite across the world. Thus, identifying the key toxins from different  
102 medically-important snake species that are responsible for causing life-threatening coagulopathies would  
103 enable us to take an informed approach to generating new, targeted, therapies for snakebite.

104 Recently we developed a 384 well plate-reader based plasma coagulation assay (19), which gave us the  
105 opportunity to perform high-throughput profiling of haemotoxic snake venoms. In addition, we developed an

106 'at-line' nanofractionation setup for high-throughput venom screening of individual components in crude  
107 venoms towards selected bioactivities (20, 21). Briefly, crude snake venoms are first separated with liquid  
108 chromatography, followed by a post-column split, which gives the opportunity of mass spectrometry (MS)  
109 detection in parallel to high-resolution nanofractionation (i.e. 6s per well) onto 384-well plates for  
110 bioassaying. Subsequently, bioactivity chromatograms can be constructed by plotting the readout of each  
111 well against the time of the corresponding fraction, and when coupled to our coagulation assay, these  
112 chromatograms show peaks with positive (i.e. pro-coagulation) or negative (i.e. anti-coagulation) maxima  
113 for each bioactive compound (19). Because each bioactivity chromatogram has a corresponding MS  
114 chromatogram obtained in the parallel measurement, the accurate masses of the bioactive peaks can be  
115 determined when correlating the peaks from the bioassay chromatograms with the data obtained from MS.  
116 Thus, this approach enables us to separate snake venom into fractions, and identify the proteins present in  
117 those fractions that cause coagulopathic effects in the bioassay.

118 In this study, we selected venoms from 20 different snake species, covering a broad geographical  
119 distribution and different taxonomic families, known to interfere with the blood clotting cascade, and we  
120 screened them using the described nanofractionation approach to detect their pro- and anti-coagulant  
121 activities. Subsequently, we selected seven of these venoms for detailed characterization analysis whereby  
122 wells containing bioactive compounds were subjected to tryptic digestion for full protein identification via  
123 proteomics. Our methodological approach represents a rapid and straightforward method for identifying pro-  
124 and anti-coagulant toxins in snake venoms in a throughput manner. In line with the cumulative literature,  
125 our findings show that PLA<sub>2</sub> toxins are frequently detected as anticoagulant bioactive toxins across the  
126 species tested, while serine proteases and metalloproteinases are common constituents of procoagulant  
127 venom fractions. Thus, this methodology facilitates the identification of both known and unknown  
128 coagulopathic toxins, and provides an amenable and targeted approach for testing the neutralisation of  
129 pathogenic snake venom toxins by next generation antivenoms.

130

131 **2. Materials and Methods**

132 2.1. Chemicals and stock solutions

133 The solvents and chemicals used in this research were of analytical grade. Acetonitrile (ACN) and formic  
134 acid (FA) were purchased from Biosolve (Valkenswaard, The Netherlands) and water was purified using a  
135 Milli-Q plus system (Millipore, Amsterdam, The Netherlands). Bovine plasma was obtained from Biowest  
136 (Amsterdam, The Netherlands). Iodoacetamide,  $\beta$ -mercaptoethanol, Argatroban, Ammonium bicarbonate  
137 and calcium chloride, were obtained from Sigma-Aldrich (Zwijndrecht, The Netherlands). Sequencing grade  
138 modified trypsin was purchased from Promega Benelux B.V. (Leiden, The Netherlands), and stored and  
139 handled according to the manufacturer's instructions. The snake venom pools used in this study *Echis*  
140 *ocellatus* (Nigeria), *Echis carinatus* (India), *Echis carinatus* (UAE), *Echis pyramidum leakeyi* (Kenya), *Echis*  
141 *coloratus* (Egypt), *Crotalus horridus* (USA), *Macrovipera lebetina* (Uzbekistan), *Daboia russelli* (Sri Lanka),  
142 *Bothrops asper* (Costa Rica), *Bothrops jararaca* (Brazil), *Lachesis muta* (Brazil), *Bothriechis schlegelii*  
143 (Costa Rica), *Calloselasma rhodostoma* (captive bred, Thailand ancestry), *Hypnale hypnale* (Sri Lanka),  
144 *Trimeresurus albolabris* (Thailand), *Trimeresurus stejnegeri* (Malaysia), *Deinagkistrodon acutus* (China),  
145 *Dispholidus typus* (South Africa), *Rhabdophis subminiatus* (Hong Kong) and *Oxyuranus scutellatus* (Papua  
146 New Guinea). They were sourced in house from animals held in, or historical venoms stored in, the  
147 herpetarium at the Liverpool School of Tropical Medicine, UK. These species were selected based on  
148 previous reports of coagulopathic venom activity (7, 19, 22, 23). Venoms were in lyophilized form at 4°C,  
149 until reconstitution in water to make 5 mg/mL stock solutions, which were then aliquoted and stored at –  
150 80°C until use.

151 2.2. Ethics statement

152 The maintenance and handling of venomous snakes was undertaken following approvals granted by the  
153 Animal Welfare and Ethical Review Board of the Liverpool School of Tropical Medicine and the UK Home  
154 Office (licence #X2OA6D134), and thus meet the national and legal ethical requirements set by the  
155 Government of the United Kingdom (under the Animal and scientific procedures act 1986) and EU directive  
156 2010/63/EU.

157 2.3. Liquid chromatography, at-line nanofractionation and mass spectrometry

158 Liquid chromatography separation, parallel at-line nanofractionation and subsequent mass spectrometry  
159 analyses were performed in an automated fashion. A Shimadzu UPLC system ('s Hertogenbosch, The  
160 Netherlands) was used for the LC separation. All the settings of the system were controlled with Shimadzu  
161 Lab Solutions software. Fifty microlitres of each sample was injected by a Shimadzu SIL-30AC autosampler,  
162 and the two Shimadzu LC-30AD pumps were set to a total flow rate of 500  $\mu$ l/min. A 250 $\times$ 4.6 mm Waters  
163 Xbridge Peptide BEH300 C<sub>18</sub> analytical column with a 3,5- $\mu$ m particle size and a 300-Å pore size was used  
164 for separation of the venoms. The separations were performed at 30 °C in a Shimadzu CTD-30A column  
165 oven. Mobile phase A comprised of 98% H<sub>2</sub>O, 2% ACN and 0.1% FA, and mobile phase B comprised of  
166 98% ACN, 2% H<sub>2</sub>O and 0.1% FA. A linear increase of mobile phase B from 0% to 50% in 20 min was  
167 followed by a linear increase from 50% to 90% B in 4 min and a 5 min isocratic separation at 90% B. The  
168 starting conditions (0% B) were reached linearly in 1 min and the column was then equilibrated for 10 min  
169 at 0% B. The column effluent was split post-column in a 1:9 volume ratio. The larger fraction was sent to a  
170 FractioMate™ FRM100 nanofraction collector (SPARK-Holland & VU, Netherlands, Emmen & Amsterdam)  
171 or a modified Gilson 235P autosampler. The smaller fraction was sent to the Shimadzu SPD-M30A  
172 photodiode array detector followed by an Impact II QTOF mass spectrometer (Bruker Daltonics, Billerica,  
173 MA, USA). An electrospray ionization source (ESI) was equipped onto the mass spectrometer and operated  
174 in positive-ion mode. The ESI source parameters were: capillary voltage 4.5 kV, source temperature 180°C,  
175 nebulizer at 0.4 Bar and dry gas flow 4 L/min. MS spectra were recorded in the *m/z* 50–3000 range and 1  
176 average spectrum was stored per s. Bruker Compass software was used for the instrument control and data  
177 analysis. LC fractions (1 per 6 s) were collected row by row in serpentine-like fashion on clear 384-well  
178 plates (Greiner Bio One, Alphen aan den Rijn, The Netherlands) using the in-house written software Ariadne  
179 or FractioMator when the Fractionmate was used, with a maximum of four plates in one sequence. Each  
180 chromatographic run was collected into 350 wells of one 384-well plate. After fractionation, the plates were  
181 evaporated overnight for approximately 16 h using a Christ Rotational Vacuum Concentrator RVC 2-33 CD  
182 plus (Salm en Kipp, Breukelen, The Netherlands). The plates were then stored at –20°C until further use,  
183 i.e., either bioassaying or tryptic digestion.



#### 184 2.4. Plasma coagulation assay

185 The coagulation cascade interfering properties of snake venoms were analysed using a previously  
186 described plasma coagulation assay (19). Briefly, 20  $\mu\text{L}$  of 20 mM calcium chloride solution (room  
187 temperature) was dispensed onto a 384-well plate containing LC fractionated snake venom using a Thermo  
188 Scientific multidrop 384 reagent dispenser. Next, 20  $\mu\text{L}$  of bovine plasma (room temperature) was dispensed  
189 into each well. Finally, the plate was placed into the plate reader and the absorbance was measured  
190 kinetically at 595 nM for 80 cycles ( $\pm$  90 min) at 25°C.

191 The resulting data was normalized and analysed in three different ways to differentiate between  
192 anticoagulant, fast procoagulant and slow procoagulant detected bioactive components First, the last  
193 measurement cycle was plotted as a single point measurement to display the anticoagulant compounds.  
194 Second, the average slope of cycles 1-5 were plotted to show the fast procoagulant components. Last, the  
195 average slope of cycles 1-15 were plotted to show the remainder of the procoagulant components (“slow  
196 procoagulants”). The rationale for plotting the procoagulant activity in two different ways is that the fast  
197 procoagulant compounds clot the plasma in the wells in a distinct manner, resulting in a rapid rise in  
198 absorbance followed by a plateau, and where this plateau typically occurs at a lower overall absorbance  
199 than that observed with the “slow procoagulant” components. Thus, wells containing the slower  
200 procoagulant components reach an absorbance that surpasses those of the wells containing the fast  
201 procoagulants, but over a prolonged period of time.

#### 202 2.5. Correlating coagulation data with mass spectrometry data

203 The elution times and peak widths at half maximum of the peaks observed in the bioassay chromatograms  
204 were determined. For the corresponding time interval, the average mass spectrum was extracted from the  
205 parallel recorded MS chromatogram (total-ion current (TIC)). For all  $m/z$ 's with a significant signal in this  
206 mass spectrum, extracted-ion currents (XICs) were plotted. Based on matching peak shape and retention  
207 time,  $m/z$ 's were assigned to the appropriate bioactive peaks observed in the bioassay chromatogram  
208 based. The charge states of the particular one deconvolutes spectra were assigned by the software based  
209 on the observed isotope distribution. Finally, deconvolution of the full mass spectra recorded for the  
210 assigned peaks provided the accurate monoisotopic masses.

211 The difference in flow rate of the flow ratio directed to the bioassay and the flow ratio directed to the mass  
212 spectrometer after the post-column split caused a constant time delay between the nanofractionated plates  
213 and the obtained MS data. To determine the duration of this delay, the thrombin inhibitor argatroban was  
214 nanofractionated, resulting in a negative peak in the plasma coagulation assay, which could be correlated  
215 to its corresponding known extracted ion current (shown in SI Fig 1). The difference in elution time between  
216 the two peaks is the delay between the MS and the nanofractionation collector and was found to be 78 sec.  
217 Using the determined delay, the  $m/z$ -values measured in the MS could be correlated with the bioactive  
218 peaks observed in the bioassay chromatograms.

## 219 2.6. Identification of coagulopathic toxins via tryptic digestion

220 After for a specific sample the wells containing bioactive compounds were pinpointed, the same sample was  
221 fractionated again, and the content of the active wells was subjected to tryptic digestion in order to identify  
222 coagulopathic toxins using a proteomics approach. For that, the plate was first freeze-dried, and then 40  $\mu\text{L}$   
223 of water was added to each selected well, reconstituting the contents for 30 min at room temperature. Next,  
224 10  $\mu\text{L}$  from each well was transferred to an Eppendorf tube containing 15  $\mu\text{L}$  of digestion buffer (25 mM  
225 ammonium bicarbonate, pH 8.2). Subsequently, 1.5  $\mu\text{L}$  of reducing agent (0.5%  $\beta$ -mercaptoethanol) was  
226 added to each tube followed by a 10-min incubation at 95  $^{\circ}\text{C}$ . Then, the samples were cooled to room  
227 temperature and centrifuged at 150 RCF for 10 s in a Himac CT 15RE centrifuge. Next, 3  $\mu\text{L}$  of alkylating  
228 agent (55 mM iodoacetamide) was added and the mixture was incubated in the dark at room temperature  
229 for 30 min. Subsequently, 3  $\mu\text{L}$  of 0.1  $\mu\text{g}/\mu\text{L}$  trypsin was added followed by incubation at 37  $^{\circ}\text{C}$  for 3 h, after  
230 which an additional 3  $\mu\text{L}$  of trypsin solution was added to the tube and the samples were incubated overnight.  
231 Next, 1  $\mu\text{L}$  of 5% FA was added to quench the digestion, followed by brief centrifugation to remove any  
232 particulate matter. Finally, the samples were centrifuged for 10 s at 150 RCF and the supernatants were  
233 transferred to autosampler vials with glass inserts and analyzed using nanoLC-MS/MS.

234 NanoLC separation of the tryptic digests were performed using an UltiMate 3000 RSLCnano system  
235 (Thermo Fisher Scientific, Ermelo, The Netherlands). The autosampler was run in full-loop injection mode.  
236 The autosampler was set to a 1  $\mu\text{L}$  injection volume and after injection the samples were separated on an  
237 analytical capillary column (150 mm x 75  $\mu\text{m}$ ) packed in-house with Aqua C<sub>18</sub> particles (3  $\mu\text{m}$  particle size,

238 200 Å pores; Phenomenex, Utrecht, The Netherlands). The mobile phase was comprised of eluent A (98%  
239 water, 2% ACN, 0.1% FA) and eluent B (98% ACN, 2% water, 0.1% FA). The applied gradient was: 2 min  
240 isocratic separation at 5% B, linear increase to 80% B in 15 min, 3 min isocratic separation at 80% B, down  
241 to 5% B in 0.5 min and equilibration for 9 min. The column was kept at 30 °C in the column oven. Absorbance  
242 detection was performed at 254 nm followed by mass detection using a Bruker MaxisII qTOF mass  
243 spectrometer (Bruker, Bremen, Germany) equipped with a nanoESI source operating in positive-ion mode.  
244 The ESI source parameters were: source temperature, 200 °C; capillary voltage, 4.5 kV; gas flow, 10 L/min.  
245 Spectral data were stored at a rate of 1 average spectrum/s in the range of 50 to 3000 m/z. MS/MS spectra  
246 were obtained using collision induced dissociation (CID) in data-dependent mode using 35-eV collision  
247 energy. Bruker Compass software was used for instrument control and data analysis.

248 Using the data obtained for the tryptic digests of the samples, protein identification was carried out using  
249 MASCOT (Matrix Science, London, United Kingdom) searches against Swiss-Prot, NCBI nr and species-  
250 specific databases. The latter were generated from previously published transcriptomic data for those  
251 species that were available (24-27) and were used for the identification of venom toxins for which activity  
252 was observed. The following search parameters were used: ESI-QUAD-TOF as the instrument type,  
253 semiTrypsin as the digestion enzyme allowing for one missed cleavage, carbamidomethyl on cysteine as a  
254 fixed modification, amidation (protein C-terminus) and oxidation on methionine as variable modifications, ±  
255 0.05 Da fragment mass tolerance and ± 0.2 Da peptide mass tolerance. To compare the deconvoluted  
256 monoisotopic masses with masses found by Mascot we used Uniprot to obtain information about potential  
257 PTMs and the presence or absence of pro and signal peptides. Uniprot contains transcriptomic data which  
258 usually does not represent the native form of the toxins since it does not take possible PTMs and the  
259 absence of pro or signal peptides into account. Therefore toxins were drawn in Chemdraw including the  
260 appropriate PTMs and excluding any pro or signal peptides in order to obtain the exact mass to facilitate  
261 correlations between XICs and the MS data. The Uniprot database generated a high number of Mascot  
262 identities from which a selection was made based on protein score (> 50), sequence coverage (> 20%) and  
263 known activity.

264 2.7. Statistical analysis

265 Comparisons of the molecular weights of the various procoagulant and anticoagulant venom toxins detected  
266 from the seven venoms were performed using the R package Artool (28). The data comprised of the  
267 molecular weights of toxin identities found through tryptic digestion and Mascot database searching  
268 described above. The full data set of toxin molecular weights can be found in Table 2. As the compiled data  
269 was found to be non-Gaussian in distribution, a non-parametric factorial analysis was performed, which was  
270 undertaken using the function art() in Artool (28).

271

272 **3. Results & Discussion**

273 *3.1. Coagulopathic activity profiling of snake venoms*

274 The objective of this study was to characterise the coagulopathic activity of various snake venoms and  
275 identify their coagulopathic toxins. Our approach consisted of an initial screening strategy, whereby the  
276 bioactivity of 20 snake venoms sourced from different taxonomic families and geographic origins were  
277 elucidated, followed by in depth proteomic characterization of the active coagulopathic compounds for  
278 seven of those venoms. The initial HT screening approach utilized high-resolution LC fractionation of  
279 venom (50  $\mu$ L injections of 5 mg/mL solutions) into a 384-well plate coupled to a plasma coagulation  
280 assay. This bioassay measures differences in clotting velocity between control wells which produce a  
281 normal clotting profile (e.g. plasma in the presence of calcium chloride), and wells containing bioactive  
282 components (i.e. procoagulants or anticoagulants). Plotting the different velocities against the time of  
283 the fraction results in positive peaks for procoagulant compounds (where clotting is more rapidly  
284 stimulated, resulting in enhanced clotting speed) and negative peaks for anticoagulant compounds  
285 (where clotting is reduced or inhibited, resulting in prolonged clotting times or prevention of clotting).

286 **Table 1.** Semi-quantitative determination of procoagulant activity of venom of 20 snake species. The  
287 extent of pro- and anti-coagulant activity is graded from strong (+++) to weak (+), where 0 represents  
288 no activity detected.

289

| Species                        | Pro | Anti | Species                        | Pro | Anti |
|--------------------------------|-----|------|--------------------------------|-----|------|
| <i>Echis ocellatus</i>         | +   | 0    | <i>Bothriechis schlegelii</i>  | ++  | ++   |
| <i>Echis carinatus</i>         | ++  | ++   | <i>Calloselasma rhodostoma</i> | ++  | 0    |
| <i>Echis carinatus</i>         | +   | 0    | <i>Hypnale hypnale</i>         | ++  | 0    |
| <i>Echis pyramidum leakeyi</i> | +   | ++   | <i>Trimeresurus albolabris</i> | +   | +    |
| <i>Echis coloratus</i>         | +   | ++   | <i>Trimeresurus stejnegeri</i> | +   | ++   |
| <i>Crotalus horridus</i>       | +   | 0    | <i>Deinagkistrodon acutus</i>  | +   | 0    |
| <i>Macrovipera lebetina</i>    | +   | ++   | <i>Dispholidus typus</i>       | +   | 0    |
| <i>Daboia russelii</i>         | ++  | +++  | <i>Rhabdophis subminiatus</i>  | 0   | 0    |
| <i>Bothrops asper</i>          | +++ | +++  | <i>Oxyuranus scutellatus</i>   | 0   | +++  |
| <i>Bothrops jararaca</i>       | ++  | 0    | <i>Lachesis muta</i>           | ++  | ++   |

290  
291  
292  
293  
294  
295  
296  
297  
298  
299  
300  
301  
302  
303  
304  
305  
306

Based on the initial screening, the pro- and anti-coagulant activities of the 20 snake venoms were compared semi-quantitatively based on the observed activity (Table 1). For a detailed view of the resulting assay data for each of these venoms we direct the reader to SI Fig 2. Our findings demonstrate a variable pattern of coagulopathic activity among those species at the concentration tested. The majority of the venoms tested demonstrated procoagulant activities, which was anticipated given prior findings (7), although the extent of this activity varied extensively, with *Bothrops asper* providing the most potent effect. Surprisingly, neither *Oxyuranus scutellatus* or *Rhabdophis subminiatus* venoms exhibited evidence of procoagulation under the assay conditions used here, despite prior reports of this venom activity (7, 22). Similarly, we observed extensive variation in anticoagulant venom effects, with three of the 20 species showing maximal effects (Table 1), while we did not detect discernible anticoagulant venom activity for nine of the species. Notably, *B. asper* also exhibited the most potent anticoagulant effects detected (alongside *Daboia russelii* and *Oxyuranus scutellatus*), demonstrating that this venom is highly coagulopathic, and acts via both procoagulant and anticoagulant activities.

307 Seven venoms (underlined in Table 1) were selected for in depth characterisation. These venoms were  
308 selected because they represent snakes of greatest medical importance in their distinct geographic  
309 locales (e.g. the viperid species *Echis ocellatus*, *Daboia russelii*, *Bothrops asper*, *B. jararaca*,  
310 *Calloselasma rhodostoma*) or because they represent different snake families (e.g. the elapid species  
311 *Oxyuranus scutellatus* and the colubrid species *Dispholidus typus*). The results of these optimized  
312 experiments demonstrated that all seven of the snake venoms exhibited substantial procoagulant  
313 venom activity (Figure 1), broadly consistent with our initial venom screen (Table 1), and recent analyses  
314 undertaken using crude venom (7, 22, 29-35). The notable exception to this was that of *O. scutellatus*,  
315 which did not exhibit procoagulant activity in our initial screen (Table 1), but did so in these optimized  
316 experiments (Figure 1). These latter findings are more consistent with the literature than our earlier  
317 experiment (22), and likely reflect the differences in venom concentration (5mg/mL instead of 1mg/mL)  
318 and CaCl<sub>2</sub> (20 mM instead of 100 mM) used for the subsequent optimized experiments. The decrease  
319 of CaCl<sub>2</sub> resulted in an assay readout with significantly less baseline noise and therefore increased  
320 sensitivity, which combined with increased venom concentration, resulted in the detection of  
321 procoagulant venom activity for *O. scutellatus*.

322

### 323 3.2. Proteomic identification of coagulopathic toxins

#### 324 3.2.1. Correlation of bioactivity peaks with mass spectrometry data

325 After coagulopathic profiling of the venoms, the first step in identifying the active toxins was to assign  
326 accurate masses of individual venom components exhibiting activity in the plasma coagulation assay.  
327 This was done by correlating bioactivity chromatograms to the corresponding MS chromatograms. This  
328 correlation was based on elution time and peak shape of the bioactive peaks. The data interpretation of  
329 the analysis of the seven snake venoms assayed here are shown in figures 1 and 2, and the *m/z*-values  
330 and their corresponding masses for all bioactives can be found in table 2. This method proved to be  
331 successful for masses up to 15 kDa, however larger toxins showed to be much more difficult to correlate.  
332 This was most likely caused by a lack of sensitivity of the LC-MS caused by poor ionization or insufficient  
333 amounts of the relevant proteins.

334 *3.2.2. NanoLC-MS/MS analysis of tryptic digests of venom fractions showing bioactivity*

335 In the second step to identify the coagulopathic venom toxins observed in the plasma coagulation assay  
336 after fractionation, venoms were re-fractionated and the content of selected wells containing bioactive  
337 compounds was subjected to tryptic digestion (see SI Fig 3 for details of well selection for each venom).  
338 The digested content of each well was analysed by nanoLC-MS/MS and the data was subjected to a  
339 Mascot database search using the Uniprot database and species-specific databases compiled from  
340 transcriptomic data. We noted that the search results provided by the Uniprot database provided a large  
341 number of Mascot identities at the timeframes of the pro- and anti-coagulant activities. This is likely the  
342 result of the bioactive compound not having an exact match in the database due to low toxin  
343 representation, but having high sequence similarity to a number of venom toxins found in related snake  
344 species. The toxin identities mentioned in the text below were selected based on the sequence  
345 coverage, protein score and known functional activity, and the full results are detailed in the SI Uniprot  
346 database table in the Supplementary Information. Thereafter, we compared the deconvoluted  
347 monoisotopic masses of the XICs correlated with the bioactive peaks (described above) with the masses  
348 of the compounds identified via Mascot to assign protein identities found on Uniprot to coagulopathic  
349 venom toxins (Table 2). This proved to be again successful for smaller toxin components (<15 kDa),  
350 but for larger toxins (e.g. >20kDa) none of the XICs could be correlated to Mascot identities (Table 2).



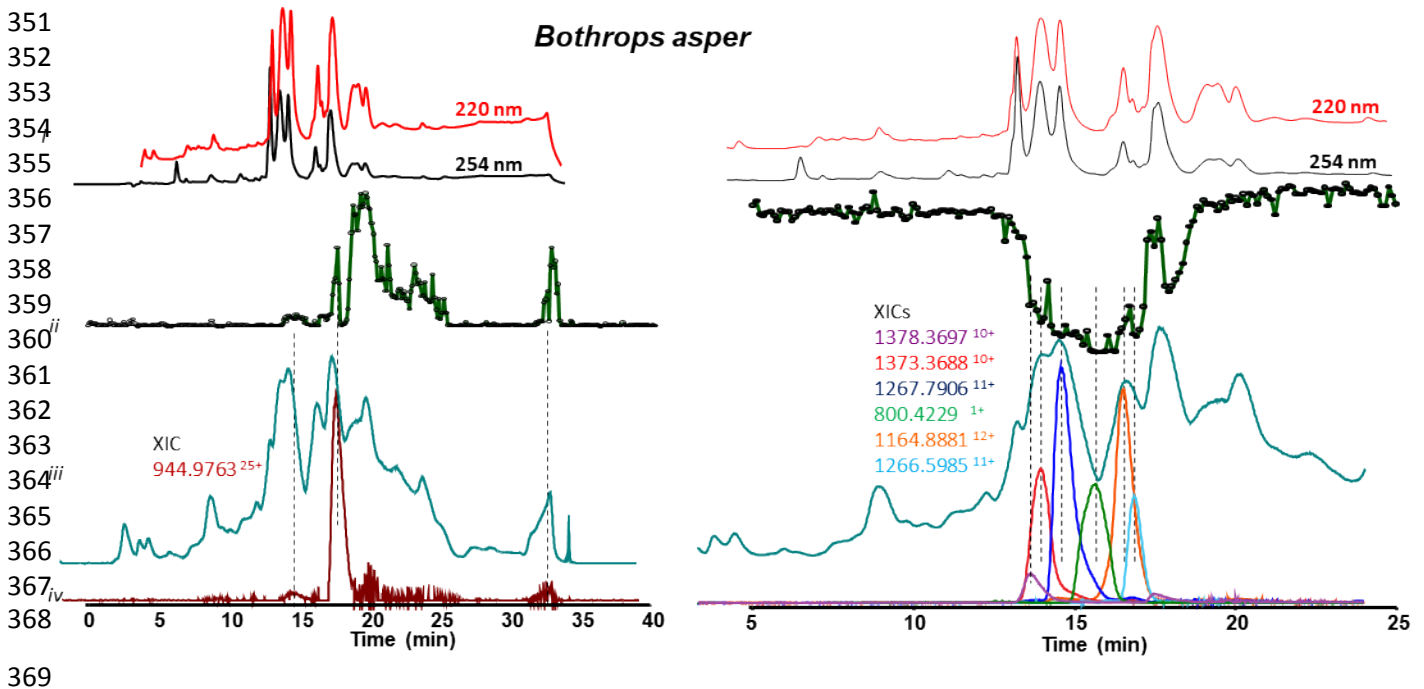

370 **Fig 1. Detection of coagulation interfering compounds of *Bothrops asper* by correlating MS and**  
371 **bioassay data obtained upon LC analysis of crude snake venom (5 mg/mL). *i*: UV chromatograms**  
372 **detected at 220 and 254 nm. *ii*: Bioactivity chromatograms obtained after fractionation by plotting the results**  
373 **of the plasma coagulation assay against time; the positive and negative peaks indicate the presence of**  
374 **procoagulant and anticoagulant bioactive compounds respectively. *iii*: MS chromatograms (TIC), *iv*:**  
375 **Extracted-ion chromatograms (XICs) of *m/z*-values corresponding to bioactive peaks. Further experimental**  
376 **conditions, see Materials and Methods section.**

377  
378  
379

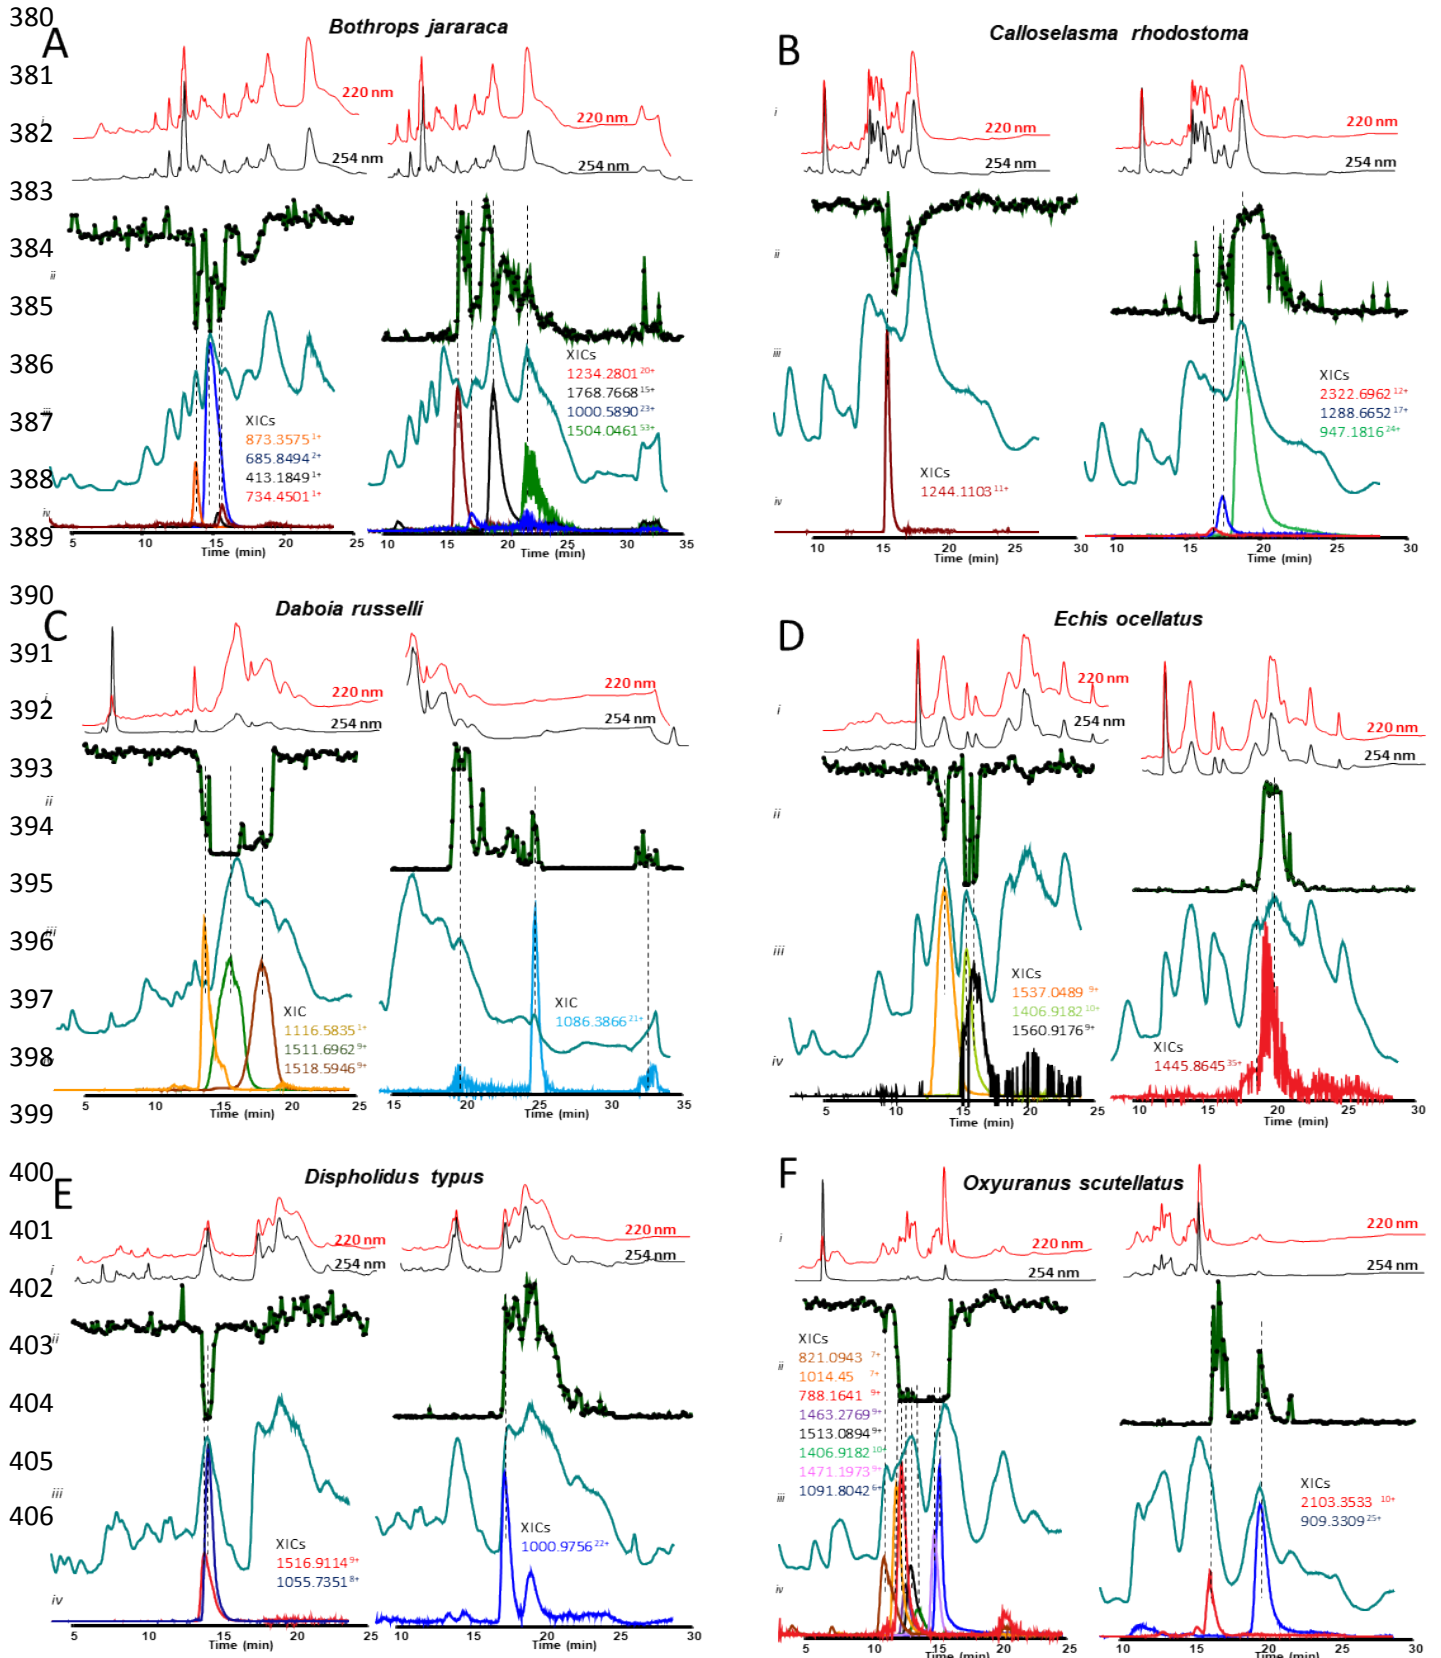

407 **Fig 2. Identification of coagulopathic compounds from the remaining six venoms by correlating MS**  
408 **data with bioassay data.** *i:* UV trace of the snake venoms at 220 and 254 nm obtained by LC-MS. *ii:*  
409 bioactivity chromatograms obtained by plotting the results of the plasma coagulation assay in Prism  
410 software. The peaks with positive (left) and negative (right) maxima indicate the presence of procoagulant  
411 and anticoagulant bioactive compounds respectively. 6-s resolution fractions were collected onto 384 well  
412 plates by the nanofractionator after 50- $\mu$ L injection of crude snake venom at a concentration of 5 mg/mL. *iii:*  
413 LC-MS chromatograms displaying the total ion current (TIC), *iv:* the extracted ion currents (XICs) of the *m/z*-  
414 values corresponding to bioactive peaks found in the MS spectra.

415 **Table 2.** Assignment of coagulopathic venom toxins based on masses detected for intact bioactive  
 416 components and Mascot hits after tryptic digestion.

417  
 418

| Species                  | m/z-value     | MS accurate mass | Mascot protein hits | Mascot exact mass | Toxin class      | Activity      |
|--------------------------|---------------|------------------|---------------------|-------------------|------------------|---------------|
| <i>Bothrops asper</i>    | 1378.37 (10+) | 13765.58         | PA2H3_BOTAS         | 13765.58          | PLA <sub>2</sub> | Anticoagulant |
|                          | 1373.37 (10+) | 13714.56         | PA2H2_BOTAS         | 13714.56          | PLA <sub>2</sub> | Anticoagulant |
|                          | 1164.88 (12+) | 13957.53         | PA2B3_BOTAS         | 13957.49          | PLA <sub>2</sub> | Anticoagulant |
|                          | 1267.79 (11+) | 13925.58         | -                   | -                 | -                | Anticoagulant |
|                          | 800.42 (1+)   | 799.42           | -                   | -                 | -                | Anticoagulant |
|                          | 1266.60 (11+) | 13912.46         | PA2HA_BOTAS*        | 13896.51          | PLA <sub>2</sub> | Anticoagulant |
|                          | 944.98 (25+)  | 23814.00         | -                   | -                 | -                | Procoagulant  |
|                          | -             | -                | VM1B1_BOTAS         | 22735             | SVMP             | Procoagulant  |
| <i>Bothrops jararaca</i> | 873.36 (1+)   | 872.35           | -                   | -                 | -                | Anticoagulant |
|                          | 685.85 (2+)   | 1369.68          | -                   | -                 | -                | Anticoagulant |
|                          | 413.18 (1+)   | 412.12           | -                   | -                 | -                | Anticoagulant |
|                          | 734.45 (1+)   | 733.44           | -                   | -                 | -                | Anticoagulant |
|                          | 1234.29 (20+) | 24665.60         | -                   | -                 | -                | Procoagulant  |
|                          | 1768.77 (25+) | 26531.50         | -                   | -                 | -                | Procoagulant  |
|                          | 1000.59 (23+) | 23013.55         | -                   | -                 | -                | Procoagulant  |
|                          | 1504.05 (53+) | 79714.44         | -                   | -                 | -                | Procoagulant  |
|                          | -             | -                | VSPA_BOTJA          | 25555.45          | SVSP             | Procoagulant  |
|                          | -             | -                | VSP1_BOTJA          | 25087.68          | SVSP             | Procoagulant  |
|                          | -             | -                | VSP2_BOTJA          | 25183.62          | SVSP             | Procoagulant  |
|                          | -             | -                | SLEA_BOTJA          | 15199.29          | C-Type lectin    | Procoagulant  |
|                          | -             | -                | VM3JA_BOTJA         | 46790.97          | SVMP             | Procoagulant  |
| -                        | -             | VM2J2_BOTJA      | 30839.23            | SVMP              | Procoagulant     |               |

|                                |               |                    |                     |               |                    |               |
|--------------------------------|---------------|--------------------|---------------------|---------------|--------------------|---------------|
| <i>Calloselasma rhodostoma</i> | 1244.11 (11+) | 13665.08           | <b>PA2BD_CALRH</b>  | 13665.02      | PLA <sub>2</sub>   | Anticoagulant |
|                                | 2322.70 (12+) | 27872.35           | -                   | -             | -                  | Procoagulant  |
|                                | 1288.67 (17+) | 21881.17           | -                   | -             | -                  | Procoagulant  |
|                                | 947.18 (24+)  | 22693.13           | -                   | -             | -                  | Procoagulant  |
|                                | -             | -                  | <b>VSPF2_CALRH</b>  | 26431.16      | SVSP               | Procoagulant  |
|                                | -             | -                  | <b>VM1K_CALRH</b>   | 22966.17      | SVMP               | Procoagulant  |
|                                | -             | -                  | <b>VM2RH_CALRH</b>  | 30755.33      | SVMP               | Procoagulant  |
| <i>Daboia russelli</i>         | 1511.70 (9+)  | 13587.22           | <b>PA2B8_DABRR</b>  | 13587.20      | PLA <sub>2</sub>   | Anticoagulant |
|                                | 1116.58 (1+)  | 1115.58            | -                   | -             | -                  | Anticoagulant |
|                                | 1518.59 (9+)  | 13649.25           | <b>PA2B3_DABRR*</b> | 13663.18      | PLA <sub>2</sub>   | Anticoagulant |
|                                | 1086.39 (1+)  | 22778.91           | -                   | -             | -                  | Procoagulant  |
| <i>Echis ocellatus</i>         | 1537.05 (9+)  | 13815.35           | <b>PA2HS_ECHOC</b>  | 13815.28      | PLA <sub>2</sub>   | Anticoagulant |
|                                | 1541.47 (9+)  | 13856.14           | <b>PA2A5_ECHOC</b>  | 13856.07      | PLA <sub>2</sub>   | Anticoagulant |
|                                | 1560.92 (9+)  | 14030.16           | -                   | -             | -                  | Anticoagulant |
|                                | 1445.86 (35+) | 52015.87           | -                   | -             | -                  | Procoagulant  |
|                                | -             | -                  | <b>VM3E2_ECHOC</b>  | 47274.70      | SVMP               | Procoagulant  |
|                                | -             | -                  | <b>VM3E6_ECHOC</b>  | 47062.79      | SVMP               | Procoagulant  |
|                                | -             | -                  | <b>SL1_ECHOC</b>    | 14080.37      | C-Type lectin      | Procoagulant  |
| -                              | -             | <b>SL124_ECHOC</b> | 14525.60            | C-Type lectin | Procoagulant       |               |
| <i>Dispholidus typus</i>       | 1516.91 (9+)  | 13634.10           | -                   | -             | -                  | Anticoagulant |
|                                | 1055.74 (8+)  | 8432.80            | -                   | -             | -                  | Anticoagulant |
|                                | 1000.98 (22+) | 22993.99           | -                   | -             | -                  | Procoagulant  |
| <i>Oxyuranus scutellatus</i>   | 788.16 (9+)   | 6993.29            | <b>VKT_OXYSC</b>    | 6993.29       | Kunitz-type serine | Anticoagulant |

|               |          |                    |          |   |                                       |               |
|---------------|----------|--------------------|----------|---|---------------------------------------|---------------|
|               |          |                    |          |   | protease inhibitor                    |               |
| 1091.80 (6+)  | 6536.81  | <b>VKT3_OXYSC</b>  | 6536.82  |   | Kunitz-type serine protease inhibitor | Anticoagulant |
| 821.09 (7+)   | 5737.58  | -                  | -        | - |                                       | Anticoagulant |
| 1014.45 (7+)  | 7090.32  | -                  | -        | - |                                       | Anticoagulant |
| 1463.28 (9+)  | 13151.39 | -                  | -        | - |                                       | Anticoagulant |
| 1513.09 (9+)  | 13600.74 | -                  | -        | - |                                       | Anticoagulant |
| 1406.92 (10+) | 14052.06 | -                  | -        | - |                                       | Anticoagulant |
| 1471.20 (9+)  | 13222.68 | -                  | -        | - |                                       | Anticoagulant |
| 2103.35 (10+) | 21023.53 | -                  | -        | - |                                       | Procoagulant  |
| 909.33 (25+)  | 22695.54 | -                  | -        | - |                                       | Procoagulant  |
|               |          | <b>PA2TA_OXYSC</b> | 13805.19 |   | PLA <sub>2</sub>                      | Anticoagulant |
|               |          | <b>PA2TB_OXYSC</b> | 13212.69 |   | PLA <sub>2</sub>                      | Anticoagulant |
|               |          | <b>PA21_OXYSC</b>  | 14077.02 |   | PLA <sub>2</sub>                      | Anticoagulant |
|               |          | <b>PA2TC_OXYSC</b> | 13289.79 |   | PLA <sub>2</sub>                      | Anticoagulant |

419 \*Close match and likely the same toxin due to a post-translational modification

420

421

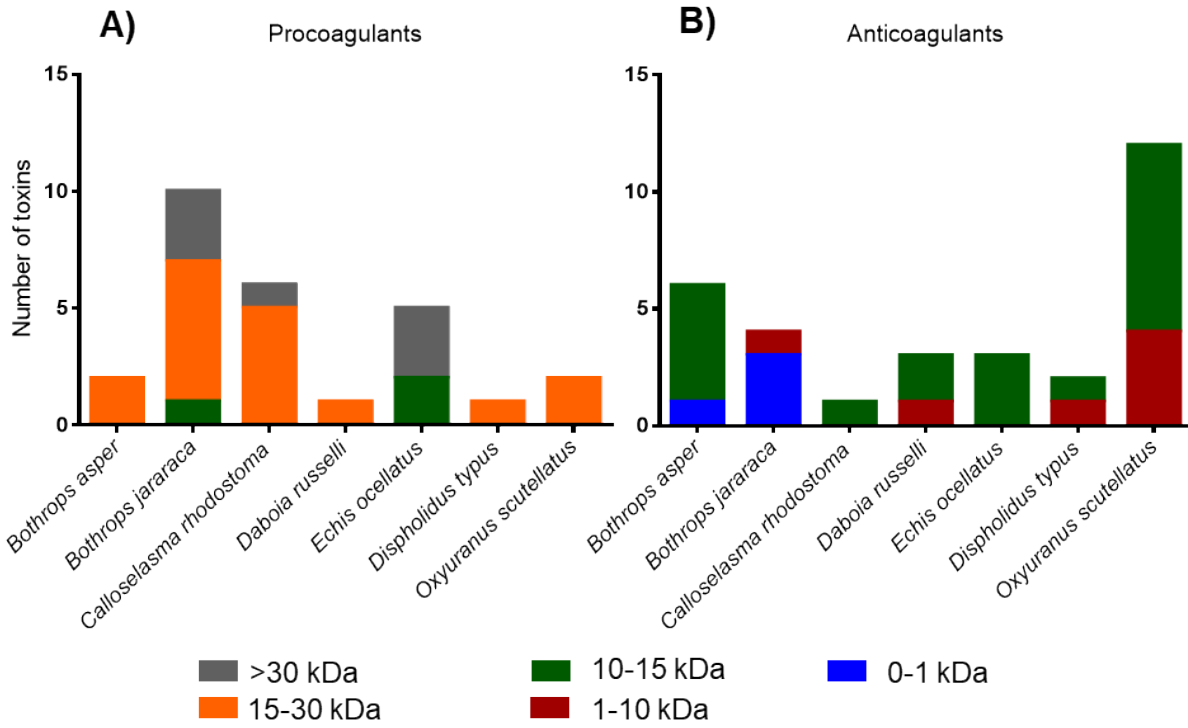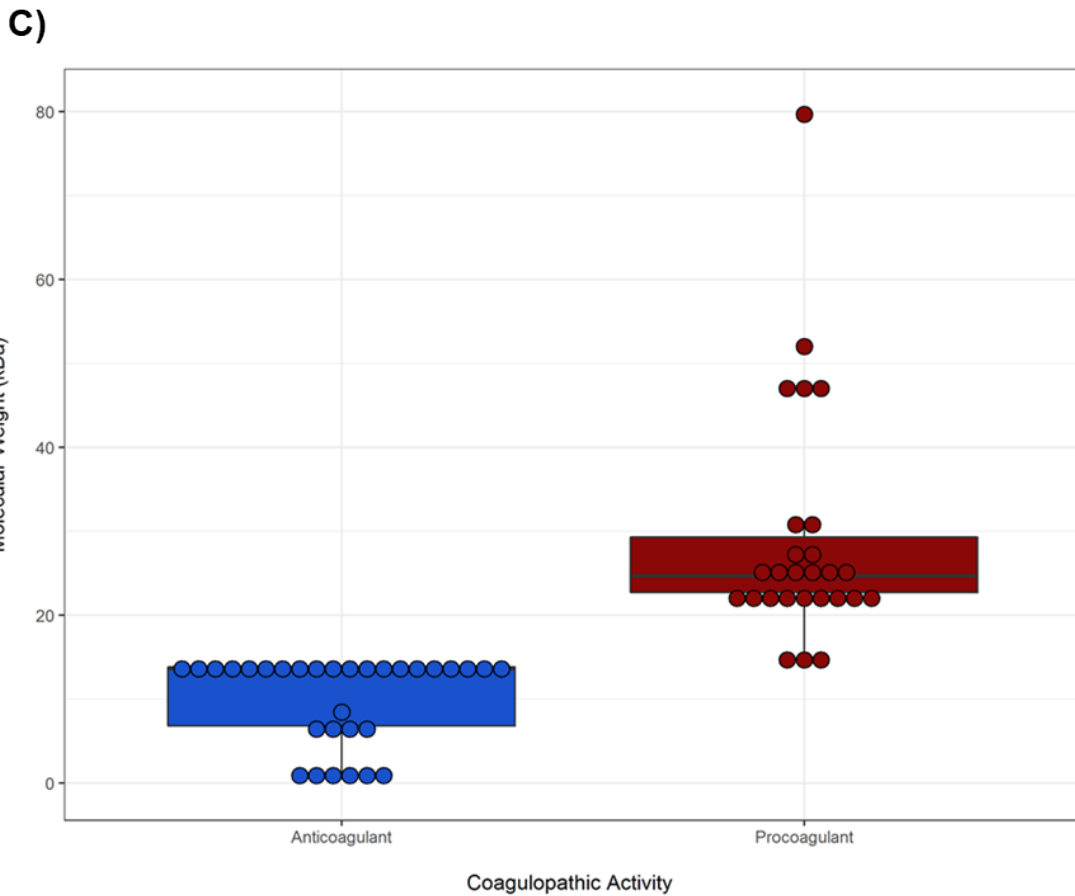

422 **Fig 3. The molecular weight distribution of the various anti- and pro-coagulant toxins identified in**  
423 **the venom of each of the seven snake species.** The number and molecular weight range of toxins  
424 identified from each snake species are summarized for procoagulant **(A)** and anticoagulant **(B)** bioactives.  
425 Toxin identifications are derived from those described in Table 2 and their respective molecular weights  
426 were calculated by drawing structures in chemdraw and adding appropriate PTMs. The full data can be  
427 found in detail in the SI Uniprot database table. **C)** Molecular weight comparisons of the anticoagulant and  
428 procoagulant toxins detected from all seven snake venoms. Boxes show the interquartile range of each  
429 dataset, with the boldened horizontal line representing the median value, and each data point is illustrated  
430 by a dot. Statistical comparisons, via non-parametric factorial analysis, reveals that procoagulant venom  
431 toxins exhibit significantly higher molecular weights than anticoagulants ( $P = 2.22e-16$ ,  $F=163.52$ ).

432  
433 Despite these limitations, summarizing the toxin identities from the Mascot hits and XICs of the various anti-  
434 and pro-coagulant venom fractions revealed noticeable differences in the masses of the toxins associated  
435 with these two bioactivities (Fig 3. Panel C). In total we detected 59 toxins in the fractions where  
436 anticoagulant activities were observed for the seven venoms. The masses ranged from 412 Da to 30 kDa  
437 in size, with the majority falling between 1 and 15 kDa. For procoagulant activity we found 38 toxins, which  
438 exhibited a much broader mass range, from 11 kDa to 79 kDa. However, the majority of these were larger  
439 than 15 kDa in size. Although there are clear inter-specific distributions in the molecular weights of the  
440 various coagulopathic toxins identified, statistical analyses reveal that procoagulant venom toxins exhibit  
441 significantly higher molecular weights than their anticoagulant counterparts (non-parametric factorial  
442 analysis;  $P = 2.22e-16$ ,  $F=163.52$ ). In the next sections we detail the toxin identities of the various  
443 coagulopathic toxins found in each of the seven venoms.

444



### 445 3.3. Mascot results summary for all seven species

#### 446 3.3.1 *Bothrops asper*

447 On the basis of the  $m/z$ -values detected for the anticoagulant-active peaks for *Bothrops asper*, six molecular  
448 masses were assigned (Figure 1; Table 1). Four of these were found to be proteins of the PLA<sub>2</sub> toxin family.  
449 A number of snake venom PLA<sub>2</sub>s have previously been described to exert anticoagulant effects via binding  
450 to factor Xa and inhibiting prothrombinase activity (36). One of the four PLA<sub>2</sub>s detected in our study has  
451 previously been described to be anticoagulant, namely “Basic phospholipase A2 homolog 2” ( $m/z$ -value of  
452 1373.3688<sup>10+</sup>, which corresponds to an accurate mass of 13714.5639 Da), which has been described to  
453 inhibit prothrombinase activity (36). The remaining three PLA<sub>2</sub>s have  $m/z$ -values of 1378.3697<sup>10+</sup>,  
454 1266.5985<sup>11+</sup> and 1164.8811<sup>12+</sup>, which correspond to accurate masses 13765.5821 Da, 13912.4649 Da and  
455 13957.5232 Da, respectively. The first of these identities corresponds to the “PLA<sub>2</sub> Basic phospholipase A2  
456 homolog M1-3-3”, which is predicted to exert myotoxic activity based on its similarity to PLA<sub>2</sub>s from other  
457 snake species (37). The second corresponds to “Basic phospholipase A2 homolog 4a” and exhibits a mass  
458 ~16 Da higher than the PLA<sub>2</sub> toxin, and this slight difference may be caused by an oxidation of methionine.  
459 This toxin has only previously been described as myotoxic (38). The third PLA<sub>2</sub> corresponds to “Basic  
460 phospholipase A2 myotoxin III” which is also only known to exhibit myotoxic activity (38-43). The remaining  
461 masses detected to potentially exert anticoagulant activity had an XICs of 800.4229<sup>1+</sup> and 1267.79<sup>11+</sup> and  
462 accurate masses of 799.4155 and 13925.58 Da, which both remain unidentified. Despite *B. asper* venom  
463 exhibiting potent procoagulant activity (e.g. Table 1, Figure 2) only one  $m/z$ -value could be assigned to  
464 components exerting this effect, 944.976325<sup>25+</sup>, and to which no corresponding match could be found in the  
465 Mascot database after proteomics analysis. Nonetheless, given that the mass of this venom toxin was 23.8  
466 kDa, it seem likely that it belongs to the SVMP or SVSP toxin family. Analysis of Mascot identities found at  
467 the time frame of the eluted procoagulant activities, detected relatively few toxins, but of those “Snake  
468 venom metalloproteinase BaP1” is a known procoagulant SVMP, and thus may be responsible for this  
469 observed bioactivity (41).

470

471 3.3.2 *Bothrops jararaca*

472 Despite the association of eight *m/z*-values with coagulopathic venom activity, we were unable to confidently  
473 assign any of these venom component masses to Mascot hits. Four of these components corresponded to  
474 anticoagulant bioactive peaks in the plasma coagulation assay (Figure 2B), and exhibited masses of 400-  
475 1400 Da. These findings contrast starkly with the majority of the anticoagulants identified in the venom of  
476 the congeneric species *B. asper* (five anticoagulants 12-14 kDa in size), with two unidentified components  
477 from that species (799 and 13925.58 Da) with 799 Da falling within a similar mass range to the  
478 anticoagulants identified in *B. jararaca* venom. While some of these low molecular weight components may  
479 simply be co-eluting with anticoagulant toxins, it is also possible that the active toxins are indeed co-eluting  
480 but are not detected by either MS or Mascot. However, further elucidation of these compounds could be of  
481 particular value if they do exhibit anticoagulant activity since the small size of these molecules makes them  
482 amenable from a drug discovery perspective. Bradykinin-potentiating peptides match the detected  
483 molecular masses and, have previously been characterized for this venom (44, 45). As for *B. asper*, none  
484 of the *m/z*-values associated with procoagulant activity could be matched to Mascot hits. Three of these  
485 components exhibited masses in the 23-27 kDa range, whereas the fourth had a mass of about 80 kDa  
486 (Table 2). The Mascot hits found at the timeframe where the procoagulant activity was observed suggest  
487 that some of these proteins may be SVSPs that are known to exhibit procoagulant (“Thrombin-like enzyme  
488 bothrombin”; sequence coverage (SC) of 22%), platelet aggregating (“Platelet-aggregating proteinase PA-  
489 BJ”; SC, 49%) or fibrinolytic (“Thrombin-like enzyme KN-BJ 2”; SC, 40%) activities. In addition, we  
490 detected matches to C-type lectins with known platelet aggregating activities (“Snaclec botrocetin subunit  
491 alpha”; SC, 20%) (46), and SVMPs previously described to promote haemorrhage and haemagglutination  
492 (“Zinc metalloproteinase-disintegrin-like jararhagin” and “Zinc metalloproteinase/disintegrin”; SC, 46% and  
493 28%, respectively) (40, 46-49).

494           3.3.3 *Calloselasma rhodostoma*

495       In total, four bioactive coagulopathic toxins were detected in the venom of *C. rhodostoma*, one that  
496       corresponded to an anticoagulant bioactivity peak, and three to procoagulant peaks (Figure 2C). The  
497       anticoagulant correlated to the XIC 1244.1103<sup>11+</sup> and had a resulting accurate mass of 13665.0848 Da.  
498       When comparing this mass with the Mascot search results, this venom toxin was matched to “Inactive basic  
499       phospholipase A2 W6D49”, a PLA<sub>2</sub> toxin known to cause local oedema but has yet to be described as  
500       having anticoagulant activity (50). Similar to those venoms previously described, the XICs could not be  
501       correlated to procoagulant bioactivity peaks or Mascot identities. However, the masses of these  
502       procoagulant venom toxins were 21-23 kDa and ~28 kDa in size, which suggests that they likely belong to  
503       the SVMP or SVSP toxin families. Indeed, the Mascot hits found where procoagulant activity was observed  
504       revealed the presence of both these toxin types, along with C-type lectins and an L-amino acid oxidase  
505       (Table 2). The SVSP identified (“Thrombin-like enzyme ancrod-2”; SC, 53%) has previously been shown to  
506       be fibrinogenolytic (51), while the literature relating to the SVMPs detected (“Snake venom  
507       metalloproteinase kistomin” and “Zinc metalloproteinase/disintegrin” SC, 33% and 27%, respectively)  
508       suggests they predominately exert anticoagulant activities, including interfering with platelet aggregation  
509       and promoting haemorrhage (52, 53). It is therefore possible that these toxins are co-eluting with  
510       procoagulant components, although given that many SVMPs are multi-functional proteins that can exert  
511       procoagulant bioactivities (54), they may be contributing to the functional effect observed here despite these  
512       activities not previously being reported.

513

514           3.3.4 *Daboia russelii*

515       The venom of *D. russelii* exhibited both potent anticoagulant and procoagulant bioactivities (Figure 2D). We  
516       identified three XICs that correlated to anticoagulant bioactivity peaks, one of which exhibited a *m/z*-value  
517       (1511.6962<sup>9+</sup>) and could be directly matched to a Mascot identity. This protein had an average mass of  
518       13587.2248 Da and corresponded with “Basic phospholipase A2 VRV-PL-VIIIa” (sequence coverage of  
519       82%) - a PLA<sub>2</sub> toxin that has been previously described to be anticoagulant (36). Of the remaining  
520       anticoagulant XICs, one exhibited a mass of 13649.2513 Da (*m/z*-value 1518.5946<sup>9+</sup>) and could be  
521       correlated to “Basic phospholipase A2 3” (55) exhibiting a mass ~14 Da higher than the PLA<sub>2</sub> toxin, and

522 this slight difference may be caused by a methylation. , whereas the other protein was much smaller in size  
523 ( $m/z$ -value 1116.5835<sup>1+</sup>; average mass 1115.5759 Da), and remains unidentified. We identified one XIC  
524 ( $m/z$ -value 1086.3866<sup>2+</sup>) that correlated with a bioactive procoagulant peak, but were also unable to match  
525 this via Mascot database searches. The molecular mass of this venom toxin was 22778.9073 Da, which  
526 raises the possibility of it being an SVMP or SVSP toxin.

527

### 528 3.3.5 *Echis ocellatus*

529 We identified three anticoagulant bioactivity peaks in the venom of *Echis ocellatus* that could be linked to  
530 XICs (Figure 2E), and two of these were matched to Mascot hits. Both of these XICs ( $m/z$ -values of  
531 1537.0489<sup>9+</sup> and 1541.4718<sup>9+</sup>) resulted in similar average mass values (13815.3523 Da and 13856.1382)  
532 and matched the PLA<sub>2</sub> toxins “Phospholipase A2 homolog” and “Acidic phospholipase A2 5”. Despite these  
533 identifications, and prior reports of PLA<sub>2</sub>s generally exerting anticoagulant activities (16), neither of these *E.*  
534 *ocellatus* PLA<sub>2</sub>s have previously been described as anticoagulants (33, 56, 57). Despite the venom from  
535 these species being potentially procoagulant (7, 58), we only identified one XIC that could be correlated to a  
536 procoagulant bioactivity peak. This protein had a  $m/z$ -value of 1445.8645<sup>35+</sup> and a corresponding mass of  
537 52015.873 Da, but could not be matched to a Mascot hit. Nonetheless, the mass recovered suggests that  
538 this could be a SVMP, particularly since this venom is known to be dominated by this toxin class (33), and  
539 has previously been demonstrated to contain P-III SVMPs of ~52 kDa in size (13), and potent procoagulant  
540 SVMPs, such as the ~55 kDa prothrombin activator ecarin (59). Supporting this tentative toxin assignment,  
541 Mascot hits at the timeframe of the procoagulant activity identified known procoagulant SVMP toxins (“Zinc  
542 metalloproteinase-disintegrin-like EoVMP2” and “Zinc metalloproteinase-disintegrin-like EoMP06” SC, 48%  
543 and 23% sequence coverage, respectively) (60, 61), along with two, much smaller molecular weight, C-type  
544 lectins (“Snaclec 1” and “Snaclec CTL-Eoc124” SC, 53% and 31%). “Zinc metalloproteinase-disintegrin-  
545 like EoVMP2” is a known prothrombin activator and “Zinc metalloproteinase-disintegrin-like EoMP06” is  
546 suspected to activate prothrombin based on its sequence similarity with a prothrombin-activating SVMP of  
547 *E. pyramidum leakyi* (Ecarin, A55796, 91% similarity) (60, 61). While it is known that some SVMPs form  
548 complexes with CTLs, including the *Echis* prothrombin activator carinactivase (62), it is unlikely that these  
549 complexes would remain intact after nanofractionation.

550           3.3.6 *Dispholidus typus*

551   The venom of *D. typus* yielded three potential coagulopathic venom toxins, two of which were associated  
552   with anticoagulant activity, and the third with procoagulant effects. Two m/z-values (1516.9114<sup>9+</sup> and  
553   1055.7351<sup>8+</sup>; masses, 13634.0965 and 8432.8015 Da) were correlated with the anticoagulants. However,  
554   these two venom toxins are closely eluting (Figure 2F) and thus it is possible that only one of these  
555   components is responsible for the anticoagulant activity. Based on their molecular weight it is tempting to  
556   speculate that this activity likely comes from the ~13 kDa compound, particularly since this mass correlates  
557   well with a number of anticoagulants detected from the other venoms under study here (e.g. PLA<sub>2</sub> toxins,  
558   13-14 kDa in size). However, given that *D. typus* is the only colubrid venom investigated in this study, and  
559   that colubrid PLA<sub>2</sub>s are distinct from those of vipers (24), this hypothesis requires testing in future work.  
560   Nonetheless, these findings are interesting because there are no prior reports of *D. typus* venom exhibiting  
561   anticoagulant activity, likely because this activity is masked by the net procoagulant activity of this venom  
562   (7). The procoagulant peak could be correlated to a mass of ~23 kDa (Table 2). This toxin most likely  
563   belongs to the SVMPS family, which are the most dominant toxin type in *D. typus* venom (24), and have  
564   previously been described to be responsible for the potent procoagulant activity of this species (63).

565

566           3.3.7 *Oxyuranus scutellatus*

567   *Oxyuranus scutellatus* is the sole representative of the elapid snake family under study here. As venom  
568   toxin composition diverged following the split of vipers from all other caenophidian snakes around 50 million  
569   years ago (64), we anticipated identifying a number of toxins types not found in viper venoms. The bioactivity  
570   chromatogram revealed a large elution region of anticoagulants, with no distinct peaks (Figure 2F). The m/z-  
571   values of eight compounds could be correlated to this anticoagulant region. Two of these (788.1641<sup>9+</sup> and  
572   1091.8042<sup>6+</sup>; masses, 6993.2858 and 6536.8065 Da) could be matched via Mascot and were identified as  
573   Kunitz-type serine protease inhibitors (Kunitz-type serine protease inhibitor taicotoxin and Kunitz-type serine  
574   protease inhibitor scutellin-3) both of which are known to exhibit anticoagulant activities and are abundant  
575   components in *O. scutellatus* venom (22, 27, 35). The remaining m/z-values had no associated Mascot  
576   match. Two of these unidentified components had molecular masses of 5.5-7.1 kDa and thus may also be  
577   anticoagulant Kunitz toxins. However, the remaining four anticoagulant XICs corresponded to molecular

578 masses in the range of ~13-14 kDa, and therefore seem likely to be PLA<sub>2</sub>s, particularly since the venom of  
579 *O. scutellatus* is rich in this toxin class (22). This assertion is also supported by four known PLA<sub>2</sub>s being  
580 detected in the timeframe of the observed anticoagulant activity, namely: Basic phospholipase A2 taipoxin  
581 alpha chain, Neutral phospholipase A2 homolog taipoxin beta chain 1, Phospholipase A2 OS1 and Neutral  
582 phospholipase A2 homolog taipoxin beta chain 2. However, none of these PLA<sub>2</sub>s have previously been  
583 described to be anticoagulant (65, 66). Despite this, and bearing in mind that elapid PLA<sub>2</sub>s are distinct from  
584 those of vipers (67), a number of elapid PLA<sub>2</sub>s have been demonstrated to exert anticoagulant effects (68,  
585 69). Nonetheless, improved separation of these venom toxins, followed by isolation and retesting, is required  
586 to confirm these tentative identifications. Two m/z-values were correlated to procoagulants with molecular  
587 masses of 21-23 kDa, but neither could be matched to Mascot results, and thus remain unidentified from  
588 this study.  
589

#### 590                    **4. Study limitations**

591    Summarising across the species studied here, we found that many of the anticoagulants detected are likely  
592    PLA<sub>2</sub> toxins, as indicated by matching masses for some, and the molecular weights determined by MS for  
593    others (i.e. ~13-14 kDa). Contrastingly, only a few of the procoagulant activity peaks observed in the plasma  
594    coagulation assay could be assigned to detected masses, and none were identified via Mascot database  
595    searches. Most probably, these components are of relatively large molecular mass and are poorly ionized,  
596    and transferred under the applied ESI and MS conditions (70). Using more dedicated conditions for intact  
597    protein analysis would likely overcome this limitation (71, 72). Masses of compounds that could be  
598    correlated to procoagulants ranged from 20 to 80 kDa, with the majority between 21 and 28 kDa.  
599    Compounds in this mass range most likely are SVMs and SVSPs, which contain toxins that have previously  
600    been described to exhibit procoagulant activities in many haemotoxic snake venoms (11, 18, 73).

601  
602    Although venom toxin enzymes are known to be relatively stable under typical RPLC separation conditions  
603    (i.e. exposure to organic solvent), on-column denaturation can occur, particularly in the case of later eluting  
604    venom toxins. Moreover, in RPLC, proteins typically yield rather broad peaks (in contrast to peptides) and  
605    representatives of multiple toxin families might elute within the same retention time frames due to poor  
606    resolution. Examples observed from this study include PLA<sub>2</sub>s coeluting with C-type lectins, and SVMs with  
607    SVSPs. Thus, for some of the potential coagulopathic toxins observed, the assignments described earlier  
608    are necessarily tentative, as assignment to specific proteins is hindered by co-elution.

609  
610    The nanoLC-MS analysis of the tryptic digests of bioactive fractions followed by Mascot database searches  
611    did, however, provide a large number of hits, indicating that venom toxins are present but were not  
612    previously detected as intact proteins directly after separation by MS. More details regarding the Mascot  
613    SwissProt database search is found in the SI. This includes Mascot finding toxins in the seven analysed  
614    snakes from different species, which is explained by the fact that there are high sequence similarities for  
615    many toxins among different snake species. From all the Mascot data obtained two extensive tables were  
616    comprised, one generated from the Uniprot database and the other from the species-specific databases  
617    (see SI Species specific databases table and SI Uniprot databases table). There was a significant difference

618 in recovering components above 20 kDa between the LC-MS-bioassay correlation approach and the  
619 nanoLC-MS approach. This was most likely caused due to the lack of sensitivity of the LC-MS caused by  
620 poor ionization or insufficient amounts of the proteins, as mentioned before. The nanoLC-MS-Mascot  
621 approach was far more sensitive due to the much better ionization of peptides compared to intact proteins.  
622 Isolation and further elucidation of the toxins correlated to the bioactivity peaks is necessary for the  
623 confirmation of their activity. Finally, it is possible that there could be co-eluting bioactive components that  
624 were not detected by MS.

625

626 It has to be mentioned that for most of the seven snakes profiled many more Mascot identities were found  
627 at the timeframes of the pro- and anticoagulant activities but that mostly only the ones for which a high  
628 sequence coverage and/or an accurate mass was established, were mentioned in the text. The venom toxin  
629 identities reported are in some cases from different species than analyzed, which means that the possible  
630 bioactive compound is not an exact match, but has high sequence similarity to a venom toxin from another  
631 snake species of which the transcriptomic data was available in the Mascot database. The sequence  
632 similarities between species are causing a high number of search hits in Mascot and this is the reason why  
633 not all findings are mentioned in the text but presented in the SI Uniprot databases table.

634



635 **5. Summary of toxin identifications**

636 Despite these limitations, the at-line nanofractionation approach in combination with the plasma coagulation  
637 assay proved to be a fast and powerful approach for the identification of a number of venom toxins that  
638 affect the coagulation cascade. Fig 4., provides a summary of the toxins that were detected as being  
639 procoagulant and anticoagulant from each of the seven snake venoms studied. For the procoagulant  
640 activities, SVMPs, SVSPs and C-type lectins were found in five out of the seven species analysed in depth,  
641 while LAAOs were found in three of the seven (Fig 4). These identifications form the basis for future  
642 confirmatory studies characterizing the procoagulant activities of the toxins identified here, and for defining  
643 those venom components that to not perturb coagulation and were detected here as the result of co-elution.  
644 For the anticoagulant activities it became evident that PLA<sub>2</sub>s play an important role for all species included  
645 in this study, as at least one PLA<sub>2</sub> was detected in each of the seven venoms. In six of the seven venoms  
646 analysed we also detected C-type lectins in bioactive regions, although only one of these was associated  
647 with anticoagulant activity (in *Oxyuranus scutellatus*). This is perhaps surprising given that C-type lectins  
648 are predominately associated with anticoagulant activities (17, 74-78), however, these toxins may perhaps  
649 work in a synergistic manner with other toxins, or may not have been associated with anticoagulant activity  
650 here, due to many eluting in the procoagulant timeframe of the bioassay, resulting in anticoagulant activities  
651 being masked by procoagulant toxins. While the reverse may also happen (e.g. weakly procoagulant toxins  
652 being masked via co-eluting in the anticoagulant areas), it is worth noting that one of the strengths of our  
653 approach is the deconvolution of coagulopathic toxin activities from the complex venom mixture, and  
654 specifically the identification of anticoagulant venom activity from these 'net' procoagulant venoms. Prior  
655 studies using crude venom have demonstrated that the majority of the venoms tested here are procoagulant  
656 and potently clot plasma (7, 29, 31, 32, 54, 79-82). Despite these observations, our nanofractionation  
657 approach clearly reveals that many of these venoms also contain anticoagulant bioactives (e.g. 10 of 20  
658 initial venoms, Table 1; 7 of 7 venoms analysed in depth; Figures 1 and 2), which are completely masked  
659 when using crude venom in such screening assays.

660

661 **A) All matches**

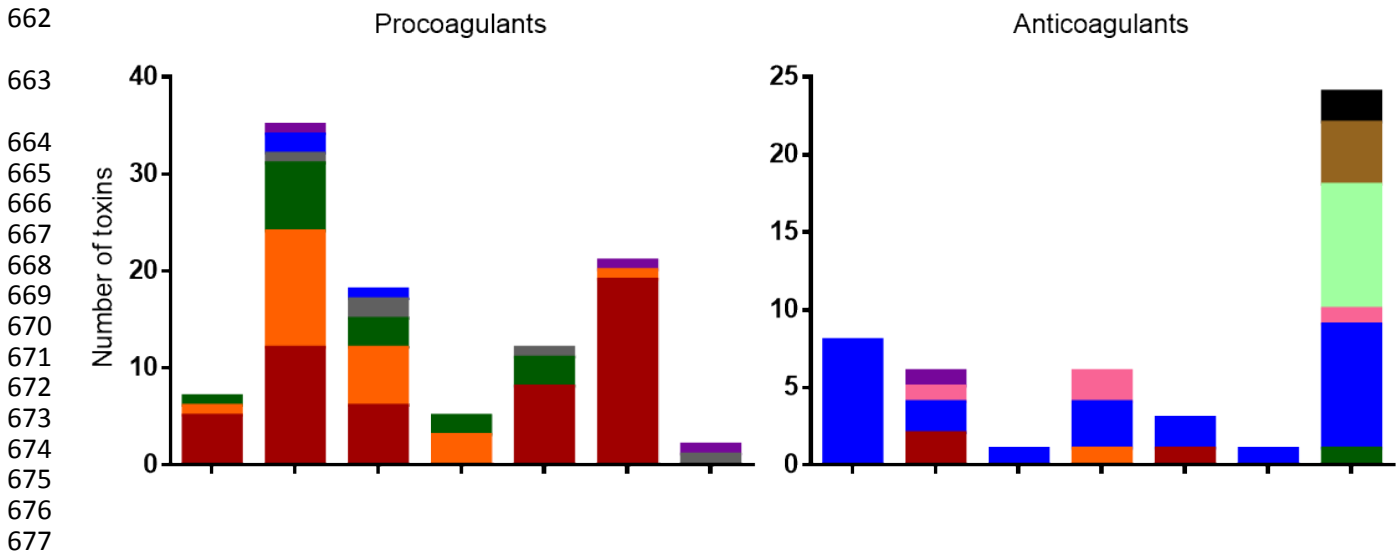

678 **B) High confidence matches only**

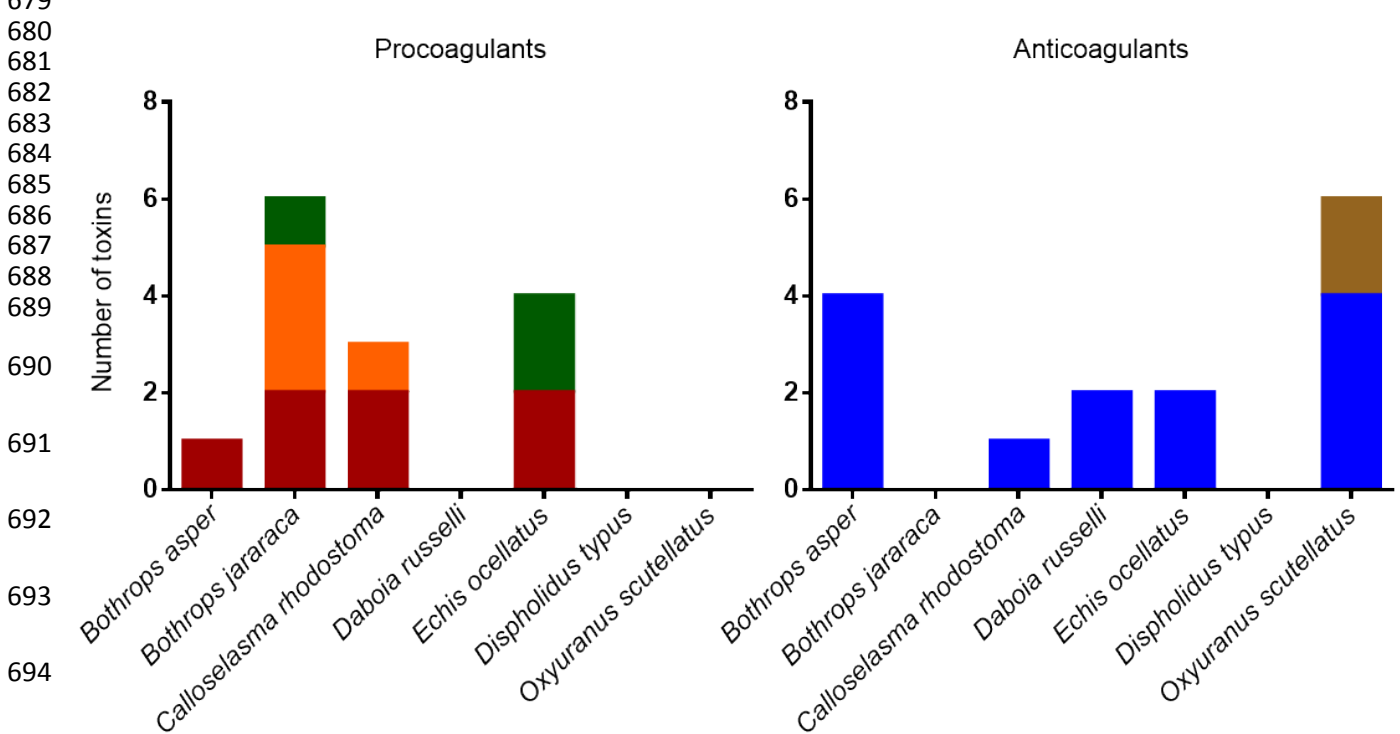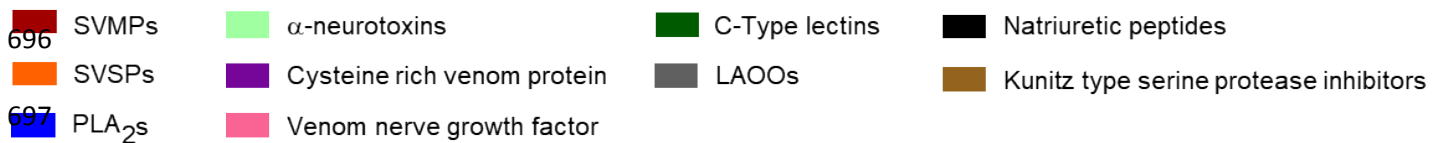

699 **Fig 4. Identification of the various anti- and pro-coagulant toxins associated with the areas in the**  
700 **bioactivity profiles where pro- and anti-coagulant activities were observed.** Panel A shows all the  
701 toxins found where pro and anticoagulant is observed. This panel is constructed with the SI species specific  
702 databases table found in the Supplementary information. Panel B shows toxins that could be matched to  
703 observed bioactivity with high confidence due to correlation with MS data or abundance of the toxin and its  
704 known activity. This panel is constructed with the data found in Table 2.

705

## 706                    **6. Conclusion**

707    The results of this study describe the validity of using a medium throughput approach for the identification  
708    of venom toxins associated with specific pathogenically-relevant bioactivities. In this case, we applied the  
709    screening approach to the topic of coagulopathy, as this is well known to be one of the most frequent,  
710    serious, pathologies observed following snakebite. The mechanisms of action of coagulopathic snake  
711    venom toxins are diverse and can result in both anticoagulant and procoagulant effects. Characterisation of  
712    specific target bioactives is challenging though, as venoms are complex mixtures of toxins, therefore  
713    methods to deconvolute them are required. The methodology applied here facilitated the rapid identification  
714    and fractionation of coagulopathic toxins, which resulted in the identification of anticoagulant venom  
715    activities previously being masked by net procoagulant effects of the crude venom, and also detected a  
716    number of anticoagulant PLA<sub>2</sub>s not previously known to exhibit anticoagulant activities. Success here,  
717    alongside the recent development of other small-scale medium-throughput bioassays focused on  
718    characterizing other relevant toxin activities (20, 83-86) means that such assays could be used  
719    interchangeably for understanding venom function and pathology – ultimately providing a ‘bioassay toolkit’  
720    for deconvoluting venom mixtures. These approaches will undoubtedly facilitate new research focused on  
721    improving snakebite therapy. Current conventional antivenoms are hampered by their low specificity, as  
722    they consist of polyclonal antibodies generated via the immunization of animals with snake venom. This  
723    process results in only 10-20% of antibodies being specific to venom toxins, with the remainder directed  
724    against environmental antigens, and of those specific antibodies only a proportion will actually be specific  
725    to the key pathogenic toxins found in any particular venom (87). Thus, much research effort is now focusing  
726    upon increasing the specificity of therapies to specific, pathogenically-important, venom toxins, including  
727    the novel application of small molecule inhibitors and monoclonal antibodies (88-93). For both these  
728    approaches, screening and identification platforms are important for the selection of molecules exhibiting  
729    desirable *in vitro* neutralizing profiles from large drug or antibodies libraries. Thus, ultimately, we foresee  
730    the application of this methodological platform to greatly enable the future development of new snakebite  
731    therapies, by providing a rational screening process that will enable targeted testing of venom toxin  
732    neutralization by new inhibitory molecules.

733                    **7. Acknowledgements**

734                    The authors thank Taline Kazandjian for assistance with statistical analyses, and Paul Rowley for the  
735                    extraction of snake venoms. This study was supported by: (i) a Sir Henry Dale Fellowship to N.R.C.  
736                    (200517/Z/16/Z) jointly funded by the Wellcome Trust and Royal Society, and (iii) a UK Medical Research  
737                    Council funded Research Grant (MR/S00016X/1) to N.R.C. and J.K.

738

739

740 **8. References**

741

- 742 1. Kasturiratne A, Wickremasinghe AR, de Silva N, Gunawardena NK, Pathmeswaran A, Premaratna  
743 R, et al. The global burden of snakebite: a literature analysis and modelling based on regional estimates  
744 of envenoming and deaths. *PLoS Med.* 2008;5(11):e218.
- 745 2. Habib AG, Kuznik A, Hamza M, Abdullahi MI, Chedi BA, Chippaux JP, et al. Snakebite is Under  
746 Appreciated: Appraisal of Burden from West Africa. *PLoS Negl Trop Dis.* 2015;9(9):e0004088.
- 747 3. Chippaux JP. Snake-bites: appraisal of the global situation. *Bull World Health Organ.*  
748 1998;76(5):515-24.
- 749 4. Gutierrez JM, Calvete JJ, Habib AG, Harrison RA, Williams DJ, Warrell DA. Snakebite envenoming.  
750 *Nat Rev Dis Primers.* 2017;3:17079.
- 751 5. Slagboom J, Kool J, Harrison RA, Casewell NR. Haemotoxic snake venoms: their functional  
752 activity, impact on snakebite victims and pharmaceutical promise. *Br J Haematol.* 2017;177(6):947-59.
- 753 6. Harrison RA, Oluoch GO, Ainsworth S, Alsolaiss J, Bolton F, Arias AS, et al. Preclinical antivenom-  
754 efficacy testing reveals potentially disturbing deficiencies of snakebite treatment capability in East Africa.  
755 *PLoS Negl Trop Dis.* 2017;11(10):e0005969.
- 756 7. Ainsworth S, Slagboom J, Alomran N, Pla D, Alhamdi Y, King SI, et al. The paraspecific  
757 neutralisation of snake venom induced coagulopathy by antivenoms. *Commun Biol.* 2018;1:34.
- 758 8. de Silva HA, Ryan NM, de Silva HJ. Adverse reactions to snake antivenom, and their prevention  
759 and treatment. *Br J Clin Pharmacol.* 2016;81(3):446-52.
- 760 9. Brown NI. Consequences of neglect: analysis of the sub-Saharan African snake antivenom market  
761 and the global context. *PLoS Negl Trop Dis.* 2012;6(6):e1670.
- 762 10. Harrison RA, Cook DA, Renjifo C, Casewell NR, Currier RB, Wagstaff SC. Research strategies to  
763 improve snakebite treatment: challenges and progress. *J Proteomics.* 2011;74(9):1768-80.
- 764 11. Kini RM, Koh CY. Metalloproteases Affecting Blood Coagulation, Fibrinolysis and Platelet  
765 Aggregation from Snake Venoms: Definition and Nomenclature of Interaction Sites. *Toxins (Basel).*  
766 2016;8(10).
- 767 12. Fry BG, Scheib H, van der Weerd L, Young B, McNaughtan J, Ramjan SF, et al. Evolution of an  
768 arsenal: structural and functional diversification of the venom system in the advanced snakes  
769 (Caenophidia). *Mol Cell Proteomics.* 2008;7(2):215-46.
- 770 13. Casewell NR, Wagstaff SC, Wuster W, Cook DA, Bolton FM, King SI, et al. Medically important  
771 differences in snake venom composition are dictated by distinct postgenomic mechanisms. *Proc Natl*  
772 *Acad Sci U S A.* 2014;111(25):9205-10.
- 773 14. Chippaux JP, Williams V, White J. Snake venom variability: methods of study, results and  
774 interpretation. *Toxicon.* 1991;29(11):1279-303.
- 775 15. Maduwage K, Isbister GK. Current treatment for venom-induced consumption coagulopathy  
776 resulting from snakebite. *PLoS Negl Trop Dis.* 2014;8(10):e3220.
- 777 16. Kini RM, Evans HJ. Structure-function relationships of phospholipases. The anticoagulant region  
778 of phospholipases A2. *J Biol Chem.* 1987;262(30):14402-7.
- 779 17. Morita T. Structures and functions of snake venom CLPs (C-type lectin-like proteins) with  
780 anticoagulant-, procoagulant-, and platelet-modulating activities. *Toxicon.* 2005;45(8):1099-114.
- 781 18. Kini RM. Serine proteases affecting blood coagulation and fibrinolysis from snake venoms.  
782 *Pathophysiol Haemo T.* 2005;34(4-5):200-4.
- 783 19. Still KS, J.:. Multipurpose HTS Coagulation Analysis: Assay Development and Assessment of  
784 Coagulopathic Snake Venoms. *Toxins (Basel).* 2017;9(12).

- 785 20. Mladic M, Zietek BM, Iyer JK, Hermarij P, Niessen WM, Somsen GW, et al. At-line  
786 nanofractionation with parallel mass spectrometry and bioactivity assessment for the rapid screening of  
787 thrombin and factor Xa inhibitors in snake venoms. *Toxicon*. 2016;110:79-89.
- 788 21. Mladic M, de Waal T, Burggraaff L, Slagboom J, Somsen GW, Niessen WMA, et al. Rapid  
789 screening and identification of ACE inhibitors in snake venoms using at-line nanofractionation LC-MS.  
790 *Anal Bioanal Chem*. 2017.
- 791 22. Herrera M, Fernandez J, Vargas M, Villalta M, Segura A, Leon G, et al. Comparative proteomic  
792 analysis of the venom of the taipan snake, *Oxyuranus scutellatus*, from Papua New Guinea and Australia:  
793 role of neurotoxic and procoagulant effects in venom toxicity. *J Proteomics*. 2012;75(7):2128-40.
- 794 23. Thakur R, Chattopadhyay P, Ghosh SS, Mukherjee AK. Elucidation of procoagulant mechanism  
795 and pathophysiological significance of a new prothrombin activating metalloprotease purified from  
796 *Daboia russelii russelii* venom. *Toxicon*. 2015;100:1-12.
- 797 24. Pla D, Sanz L, Whiteley G, Wagstaff SC, Harrison RA, Casewell NR, et al. What killed Karl Patterson  
798 Schmidt? Combined venom gland transcriptomic, venomomic and antivenomic analysis of the South African  
799 green tree snake (the boomslang), *Dispholidus typus*. *Biochim Biophys Acta Gen Subj*. 2017;1861(4):814-  
800 23.
- 801 25. Wagstaff SC, Harrison RA. Venom gland EST analysis of the saw-scaled viper, *Echis ocellatus*,  
802 reveals novel alpha9beta1 integrin-binding motifs in venom metalloproteinases and a new group of  
803 putative toxins, renin-like aspartic proteases. *Gene*. 2006;377:21-32.
- 804 26. Junqueira-de-Azevedo IL, Bastos CM, Ho PL, Luna MS, Yamanouye N, Casewell NR. Venom-  
805 related transcripts from *Bothrops jararaca* tissues provide novel molecular insights into the production  
806 and evolution of snake venom. *Mol Biol Evol*. 2015;32(3):754-66.
- 807 27. St Pierre L, Earl ST, Filippovich I, Sorokina N, Masci PP, De Jersey J, et al. Common evolution of  
808 waprins and kunitz-like toxin families in Australian venomous snakes. *Cell Mol Life Sci*. 2008;65(24):4039-  
809 54.
- 810 28. Wobbrock J, Findlater L, Gergle D, Higgins J. Proceedings of the ACM Conference on Human  
811 Factors in Computing Systems. The Aligned Rank Transform for nonparametric factorial analyses using  
812 only ANOVA procedures: ACM Press New York; 2011.
- 813 29. Sousa LF, Zdenek CN, Dobson JS, Op den Brouw B, Coimbra F, Gillett A, et al. Coagulotoxicity of  
814 *Bothrops* (Lancehead Pit-Vipers) Venoms from Brazil: Differential Biochemistry and Antivenom Efficacy  
815 Resulting from Prey-Driven Venom Variation. *Toxins (Basel)*. 2018;10(10).
- 816 30. Debono J, Dobson J, Casewell NR, Romilio A, Li B, Kurniawan N, et al. Coagulating Colubrids:  
817 Evolutionary, Pathophysiological and Biodiscovery Implications of Venom Variations between Boomslang  
818 (*Dispholidus typus*) and Twig Snake (*Thelotornis mossambicanus*). *Toxins (Basel)*. 2017;9(5).
- 819 31. Bjarnason JB, Fox JW. Hemorrhagic metalloproteinases from snake venoms. *Pharmacol Ther*.  
820 1994;62(3):325-72.
- 821 32. Takeya H, Nishida S, Miyata T, Kawada S, Saisaka Y, Morita T, et al. Coagulation factor X  
822 activating enzyme from Russell's viper venom (RVV-X). A novel metalloproteinase with disintegrin  
823 (platelet aggregation inhibitor)-like and C-type lectin-like domains. *J Biol Chem*. 1992;267(20):14109-17.
- 824 33. Wagstaff SC, Sanz L, Juarez P, Harrison RA, Calvete JJ. Combined snake venomomics and venom  
825 gland transcriptomic analysis of the ocellated carpet viper, *Echis ocellatus*. *J Proteomics*. 2009;71(6):609-  
826 23.
- 827 34. Tang EL, Tan CH, Fung SY, Tan NH. Venomomics of *Calloselasma rhodostoma*, the Malayan pit viper:  
828 A complex toxin arsenal unraveled. *J Proteomics*. 2016;148:44-56.
- 829 35. Earl ST, Richards R, Johnson LA, Flight S, Anderson S, Liao A, et al. Identification and  
830 characterisation of Kunitz-type plasma kallikrein inhibitors unique to *Oxyuranus* sp. snake venoms.  
831 *Biochimie*. 2012;94(2):365-73.

- 832 36. Faure G, Gowda VT, Maroun RC. Characterization of a human coagulation factor Xa-binding site  
833 on Viperidae snake venom phospholipases A2 by affinity binding studies and molecular bioinformatics.  
834 BMC Struct Biol. 2007;7:82.
- 835 37. Moura-da-Silva AM, Paine MJ, Diniz MR, Theakston RD, Crampton JM. The molecular cloning of a  
836 phospholipase A2 from Bothrops jararacussu snake venom: evolution of venom group II phospholipase  
837 A2's may imply gene duplications. J Mol Evol. 1995;41(2):174-9.
- 838 38. Lizano S, Lambeau G, Lazdunski M. Cloning and cDNA sequence analysis of Lys(49) and Asp(49)  
839 basic phospholipase A(2) myotoxin isoforms from Bothrops asper. Int J Biochem Cell Biol.  
840 2001;33(2):127-32.
- 841 39. Watanabe L, Vieira DF, Bortoleto RK, Arni RK. Crystallization of bothrombin, a fibrinogen-  
842 converting serine protease isolated from the venom of Bothrops jararaca. Acta Crystallogr D Biol  
843 Crystallogr. 2002;58(Pt 6 Pt 2):1036-8.
- 844 40. Serrano SM, Hagiwara Y, Murayama N, Higuchi S, Mentele R, Sampaio CA, et al. Purification and  
845 characterization of a kinin-releasing and fibrinogen-clotting serine proteinase (KN-BJ) from the venom of  
846 Bothrops jararaca, and molecular cloning and sequence analysis of its cDNA. Eur J Biochem.  
847 1998;251(3):845-53.
- 848 41. Gutierrez JM, Romero M, Diaz C, Borkow G, Ovadia M. Isolation and characterization of a  
849 metalloproteinase with weak hemorrhagic activity from the venom of the snake Bothrops asper  
850 (terciopelo). Toxicon. 1995;33(1):19-29.
- 851 42. Nishida S, Fujimura Y, Miura S, Ozaki Y, Usami Y, Suzuki M, et al. Purification and characterization  
852 of bothrombin, a fibrinogen-clotting serine protease from the venom of Bothrops jararaca. Biochemistry.  
853 1994;33(7):1843-9.
- 854 43. Francis B, Gutierrez JM, Lomonte B, Kaiser, II. Myotoxin II from Bothrops asper (Terciopelo)  
855 venom is a lysine-49 phospholipase A2. Arch Biochem Biophys. 1991;284(2):352-9.
- 856 44. Borgheresi RA, Dalle Lucca J, Carmona E, Picarelli ZP. Isolation and identification of angiotensin-  
857 like peptides from the plasma of the snake Bothrops jararaca. Comp Biochem Physiol B Biochem Mol  
858 Biol. 1996;113(3):467-73.
- 859 45. Ianzer D, Konno K, Marques-Porto R, Vieira Portaro FC, Stocklin R, Martins de Camargo AC, et al.  
860 Identification of five new bradykinin potentiating peptides (BPPs) from Bothrops jararaca crude venom  
861 by using electrospray ionization tandem mass spectrometry after a two-step liquid chromatography.  
862 Peptides. 2004;25(7):1085-92.
- 863 46. Fukuda K, Doggett T, Laurenzi IJ, Liddington RC, Diacovo TG. The snake venom protein botrocetin  
864 acts as a biological brace to promote dysfunctional platelet aggregation. Nat Struct Mol Biol.  
865 2005;12(2):152-9.
- 866 47. Serrano SM, Mentele R, Sampaio CA, Fink E. Purification, characterization, and amino acid  
867 sequence of a serine proteinase, PA-BJ, with platelet-aggregating activity from the venom of Bothrops  
868 jararaca. Biochemistry. 1995;34(21):7186-93.
- 869 48. Fernandez JH, Silva CA, Assakura MT, Camargo AC, Serrano SM. Molecular cloning, functional  
870 expression, and molecular modeling of bothrostatin, a new highly active disintegrin from Bothrops  
871 jararaca venom. Biochem Biophys Res Commun. 2005;329(2):457-64.
- 872 49. Escalante T, Nunez J, Moura da Silva AM, Rucavado A, Theakston RD, Gutierrez JM. Pulmonary  
873 hemorrhage induced by jararhagin, a metalloproteinase from Bothrops jararaca snake venom. Toxicol  
874 Appl Pharmacol. 2003;193(1):17-28.
- 875 50. Tsai IH, Wang YM, Au LC, Ko TP, Chen YH, Chu YF. Phospholipases A2 from Calloselasma  
876 rhodostoma venom gland cloning and sequencing of 10 of the cDNAs, three-dimensional modelling and  
877 chemical modification of the major isozyme. Eur J Biochem. 2000;267(22):6684-91.



- 878 51. Au LC, Lin SB, Chou JS, Teh GW, Chang KJ, Shih CM. Molecular cloning and sequence analysis of  
879 the cDNA for ancrod, a thrombin-like enzyme from the venom of *Calloselasma rhodostoma*. *Biochem J.*  
880 1993;294 ( Pt 2):387-90.
- 881 52. Au LC, Chou JS, Chang KJ, Teh GW, Lin SB. Nucleotide sequence of a full-length cDNA encoding a  
882 common precursor of platelet aggregation inhibitor and hemorrhagic protein from *Calloselasma*  
883 *rhodostoma* venom. *Biochim Biophys Acta.* 1993;1173(2):243-5.
- 884 53. Hsu CC, Wu WB, Chang YH, Kuo HL, Huang TF. Antithrombotic effect of a protein-type I class  
885 snake venom metalloproteinase, kistomin, is mediated by affecting glycoprotein Ib-von Willebrand factor  
886 interaction. *Mol Pharmacol.* 2007;72(4):984-92.
- 887 54. Ferraz CR, Arrahman A, Xie C, Casewell NR, Lewis RJ, Kool J, et al. Multifunctional Toxins in Snake  
888 Venoms and Therapeutic Implications: From Pain to Hemorrhage and Necrosis. *Frontiers in Ecology and*  
889 *Evolution.* 2019;7(218).
- 890 55. Suzuki M, Itoh T, Anuruddhe BM, Bandaranayake IK, Shirani Ranasinghe JG, Athauda SB, et al.  
891 Molecular diversity in venom proteins of the Russell's viper (*Daboia russellii russellii*) and the Indian  
892 cobra (*Naja naja*) in Sri Lanka. *Biomed Res.* 2010;31(1):71-81.
- 893 56. Bharati K, Hasson SS, Oliver J, Laing GD, Theakston RD, Harrison RA. Molecular cloning of  
894 phospholipases A(2) from venom glands of *Echis* carpet vipers. *Toxicon.* 2003;41(8):941-7.
- 895 57. Conlon JM, Attoub S, Arafat H, Mechkarska M, Casewell NR, Harrison RA, et al. Cytotoxic  
896 activities of [Ser(4)(9)]phospholipase A(2) from the venom of the saw-scaled vipers *Echis ocellatus*, *Echis*  
897 *pyramidum leakeyi*, *Echis carinatus sochureki*, and *Echis coloratus*. *Toxicon.* 2013;71:96-104.
- 898 58. Rogalski A, Soerensen C, Op den Brouw B, Lister C, Dashevsky D, Arbuckle K, et al. Differential  
899 procoagulant effects of saw-scaled viper (*Serpentes: Viperidae: Echis*) snake venoms on human plasma  
900 and the narrow taxonomic ranges of antivenom efficacies. *Toxicol Lett.* 2017;280:159-70.
- 901 59. Kornalik F, Blomback B. Prothrombin activation induced by Ecarin - a prothrombin converting  
902 enzyme from *Echis carinatus* venom. *Thromb Res.* 1975;6(1):57-63.
- 903 60. Hasson SS, Theakston RD, Harrison RA. Cloning of a prothrombin activator-like metalloproteinase  
904 from the West African saw-scaled viper, *Echis ocellatus*. *Toxicon.* 2003;42(6):629-34.
- 905 61. Howes JM, Kamiguti AS, Theakston RD, Wilkinson MC, Laing GD. Effects of three novel  
906 metalloproteinases from the venom of the West African saw-scaled viper, *Echis ocellatus* on blood  
907 coagulation and platelets. *Biochim Biophys Acta.* 2005;1724(1-2):194-202.
- 908 62. Yamada D, Sekiya F, Morita T. Isolation and characterization of carinactivase, a novel  
909 prothrombin activator in *Echis carinatus* venom with a unique catalytic mechanism. *J Biol Chem.*  
910 1996;271(9):5200-7.
- 911 63. Kamiguti AS, Theakston RD, Sherman N, Fox JW. Mass spectrophotometric evidence for P-III/P-IV  
912 metalloproteinases in the venom of the Boomslang (*Dispholidus typus*). *Toxicon.* 2000;38(11):1613-20.
- 913 64. Alencar LRV, Quental TB, Graziotin FG, Alfaro ML, Martins M, Venzon M, et al. Diversification in  
914 vipers: Phylogenetic relationships, time of divergence and shifts in speciation rates. *Molecular*  
915 *Phylogenetics and Evolution.* 2016;105:50-62.
- 916 65. Cendron L, Micetic I, Polverino de Laureto P, Paoli M. Structural analysis of trimeric  
917 phospholipase A2 neurotoxin from the Australian taipan snake venom. *FEBS J.* 2012;279(17):3121-35.
- 918 66. Rouault M, Rash LD, Escoubas P, Boilard E, Bollinger J, Lomonte B, et al. Neurotoxicity and other  
919 pharmacological activities of the snake venom phospholipase A2 OS2: the N-terminal region is more  
920 important than enzymatic activity. *Biochemistry.* 2006;45(18):5800-16.
- 921 67. Doley R, Zhou X, Kini RM. Snake venom phospholipase A2 enzymes. *Handbook of venoms and*  
922 *toxins of reptiles.* 2010;1:173-205.
- 923 68. Laloo DG, Trevett AJ, Black J, Mapao J, Saweri A, Naraqi S, et al. Neurotoxicity, anticoagulant  
924 activity and evidence of rhabdomyolysis in patients bitten by death adders (*Acanthophis* sp.) in southern  
925 Papua New Guinea. *QJM.* 1996;89(1):25-35.

- 926 69. Sharp PJ, Berry SL, Spence I, Howden ME. A basic phospholipase A from the venom of the  
927 Australian king brown snake (*Pseudechis australis*) showing diverse activities against membranes. *Comp*  
928 *Biochem Physiol B*. 1989;92(3):501-8.
- 929 70. Rodriguez-Aller M, Gurny R, Veuthey JL, Guillarme D. Coupling ultra high-pressure liquid  
930 chromatography with mass spectrometry: constraints and possible applications. *J Chromatogr A*.  
931 2013;1292:2-18.
- 932 71. Fort KL, van de Waterbeemd M, Boll D, Reinhardt-Szyba M, Belov ME, Sasaki E, et al. Expanding  
933 the structural analysis capabilities on an Orbitrap-based mass spectrometer for large macromolecular  
934 complexes. *Analyst*. 2017;143(1):100-5.
- 935 72. van de Waterbeemd M, Fort KL, Boll D, Reinhardt-Szyba M, Routh A, Makarov A, et al. High-  
936 fidelity mass analysis unveils heterogeneity in intact ribosomal particles. *Nat Methods*. 2017;14(3):283-6.
- 937 73. Kini RM, Rao VS, Joseph JS. Procoagulant proteins from snake venoms. *Haemostasis*. 2001;31(3-  
938 6):218-24.
- 939 74. Jebali J, Baza A, Sarray S, Benhaj K, Karboul A, El Ayeb M, et al. C-type lectin protein isoforms of  
940 *Macrovipera lebetina*: cDNA cloning and genetic diversity. *Toxicon*. 2009;53(2):228-37.
- 941 75. Ogawa T, Chijiwa T, Oda-Ueda N, Ohno M. Molecular diversity and accelerated evolution of C-  
942 type lectin-like proteins from snake venom. *Toxicon*. 2005;45(1):1-14.
- 943 76. Morita T. C-type lectin-related proteins from snake venoms. *Curr Drug Targets Cardiovasc*  
944 *Haematol Disord*. 2004;4(4):357-73.
- 945 77. Guimaraes-Gomes V, Oliveira-Carvalho AL, Junqueira-de-Azevedo IL, DL SD, Pujol-Luz M, Castro  
946 HC, et al. Cloning, characterization, and structural analysis of a C-type lectin from *Bothrops insularis* (BiL)  
947 venom. *Arch Biochem Biophys*. 2004;432(1):1-11.
- 948 78. Harrison RA, Oliver J, Hasson SS, Bharati K, Theakston RD. Novel sequences encoding venom C-  
949 type lectins are conserved in phylogenetically and geographically distinct *Echis* and *Bitis* viper species.  
950 *Gene*. 2003;315:95-102.
- 951 79. Gutierrez JM, Rucavado A, Escalante T, Diaz C. Hemorrhage induced by snake venom  
952 metalloproteinases: biochemical and biophysical mechanisms involved in microvessel damage. *Toxicon*.  
953 2005;45(8):997-1011.
- 954 80. Tans G, Rosing J. Snake venom activators of factor X: an overview. *Haemostasis*. 2001;31(3-  
955 6):225-33.
- 956 81. Atoda H, Hyuga M, Morita T. The primary structure of coagulation factor IX/factor X-binding  
957 protein isolated from the venom of *Trimeresurus flavoviridis*. Homology with asialoglycoprotein  
958 receptors, proteoglycan core protein, tetranectin, and lymphocyte Fc epsilon receptor for  
959 immunoglobulin E. *J Biol Chem*. 1991;266(23):14903-11.
- 960 82. Teng CM, Hung ML, Huang TF, Ouyang C. Triwaglerin: a potent platelet aggregation inducer  
961 purified from *Trimeresurus wagleri* snake venom. *Biochim Biophys Acta*. 1989;992(3):258-64.
- 962 83. Mladic M, Slagboom J, Kool J, Vonk FJ, van Wezel GP, Richardson MK. Detection and  
963 identification of antibacterial proteins in snake venoms using at-line nanofractionation coupled to LC-MS.  
964 *Toxicon*. 2018;155:66-74.
- 965 84. Mladic M, de Waal T, Burggraaff L, Slagboom J, Somsen GW, Niessen WMA, et al. Rapid  
966 screening and identification of ACE inhibitors in snake venoms using at-line nanofractionation LC-MS.  
967 *Anal Bioanal Chem*. 2017;409(25):5987-97.
- 968 85. Zietek BM, Mayar M, Slagboom J, Bruyneel B, Vonk FJ, Somsen GW, et al. Liquid chromatographic  
969 nanofractionation with parallel mass spectrometric detection for the screening of plasmin inhibitors and  
970 (metallo)proteinases in snake venoms. *Anal Bioanal Chem*. 2018;410(23):5751-63.
- 971 86. Slagboom J, Otvos RA, Cardoso FC, Iyer J, Visser JC, van Doodewaerd BR, et al. Neurotoxicity  
972 fingerprinting of venoms using on-line microfluidic AChBP profiling. *Toxicon*. 2018;148:213-22.

- 973 87. Casewell NR, Cook DA, Wagstaff SC, Nasidi A, Durfa N, Wuster W, et al. Pre-clinical assays predict  
974 pan-African Echis viper efficacy for a species-specific antivenom. PLoS Negl Trop Dis. 2010;4(10):e851.  
975 88. Albulescu L-O, Hale M, Ainsworth S, Alsolaiss J, Crittenden E, Calvete JJ, et al. Preclinical  
976 validation of a repurposed metal chelator as a community-based therapeutic for hemotoxic snakebite.  
977 bioRxiv. 2019:717280.  
978 89. Bryan-Quiros W, Fernandez J, Gutierrez JM, Lewin MR, Lomonte B. Neutralizing properties of  
979 LY315920 toward snake venom group I and II myotoxic phospholipases A2. Toxicon. 2019;157:1-7.  
980 90. Lewin M, Samuel S, Merkel J, Bickler P. Varespladib (LY315920) Appears to Be a Potent, Broad-  
981 Spectrum, Inhibitor of Snake Venom Phospholipase A2 and a Possible Pre-Referral Treatment for  
982 Envenomation. Toxins (Basel). 2016;8(9).  
983 91. Knudsen C, Laustsen AH. Recent Advances in Next Generation Snakebite Antivenoms. Trop Med  
984 Infect Dis. 2018;3(2).  
985 92. Laustsen AH, Karatt-Vellatt A, Masters EW, Arias AS, Pus U, Knudsen C, et al. Publisher  
986 Correction: In vivo neutralization of dendrotoxin-mediated neurotoxicity of black mamba venom by  
987 oligoclonal human IgG antibodies. Nat Commun. 2018;9(1):4957.  
988 93. Lee CH, Lee YC, Lee YL, Leu SJ, Lin LT, Chen CC, et al. Single Chain Antibody Fragment against  
989 Venom from the Snake Daboia russelii formosensis. Toxins (Basel). 2017;9(11).

990

991

## 992 9. Supporting Information Legends

993

994 **SI.** SI Fig 1. Correlation of mass spectrometry data with assay data using argatroban, SI Fig 2. Initial  
995 screening results of all 20 species included in the study, SI Fig 3. Toxin IDs from the specific and non-  
996 specific databases from nanofractionated toxins present in wells and subjected to proteomics.

997

998 **SI\_Species specific databases table.** All Mascot hits found with the species specific databases in the area  
999 where pro- and anticoagulant activity was observed. Table includes information on masses, retention times,  
1000 well numbers of the nanofractionated toxins, sequence coverage, protein score, toxin class  
1001 and coagulation activity.

1002

1003 **SI\_Uniprot database table.** All Mascot hits found with the Uniprot database in the area where pro- and  
1004 anticoagulant activity was observed. Table includes information on masses, retention times, well numbers of  
1005 the nanofractionated toxins, sequence coverage, protein score, toxin class and coagulation activity.

1006

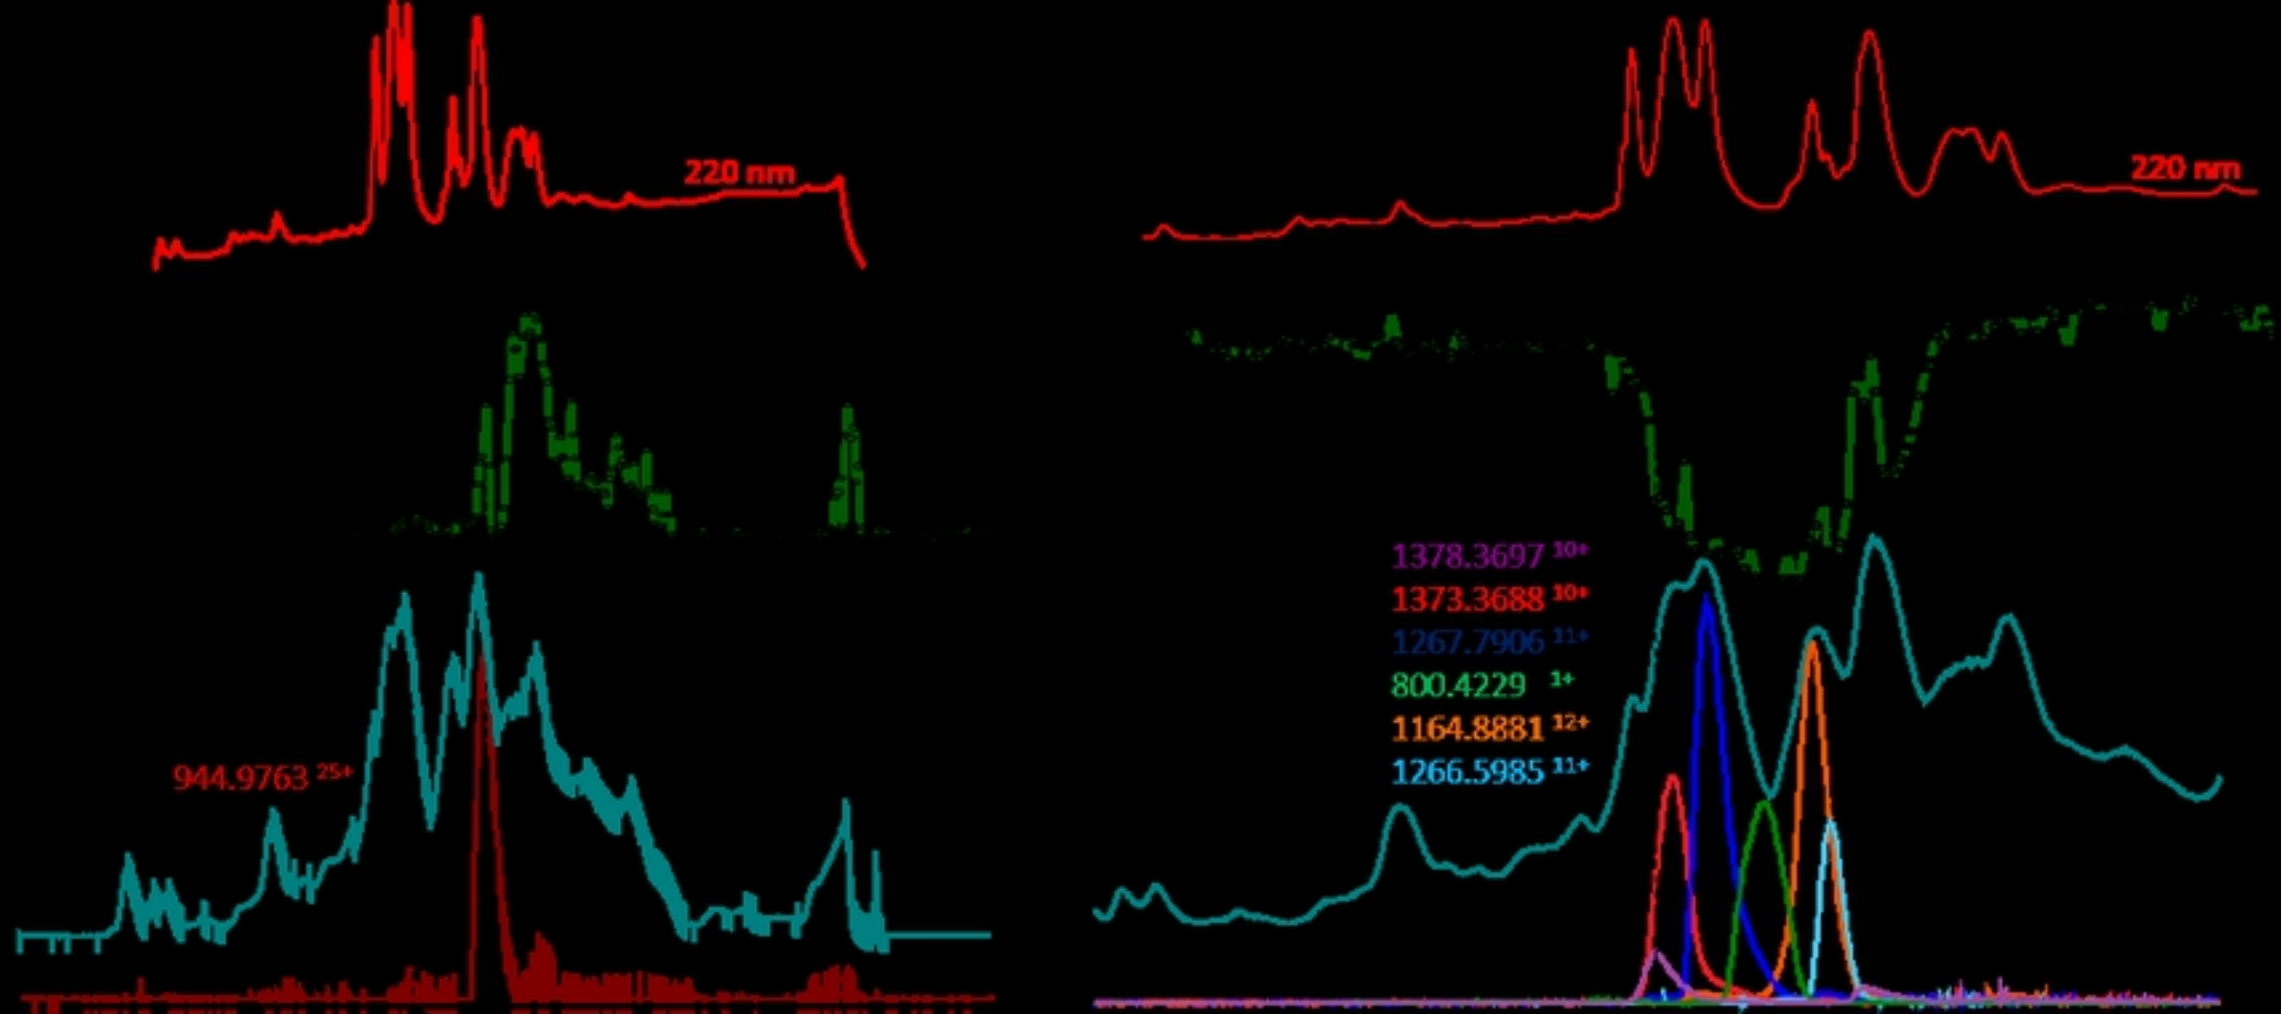

Figure

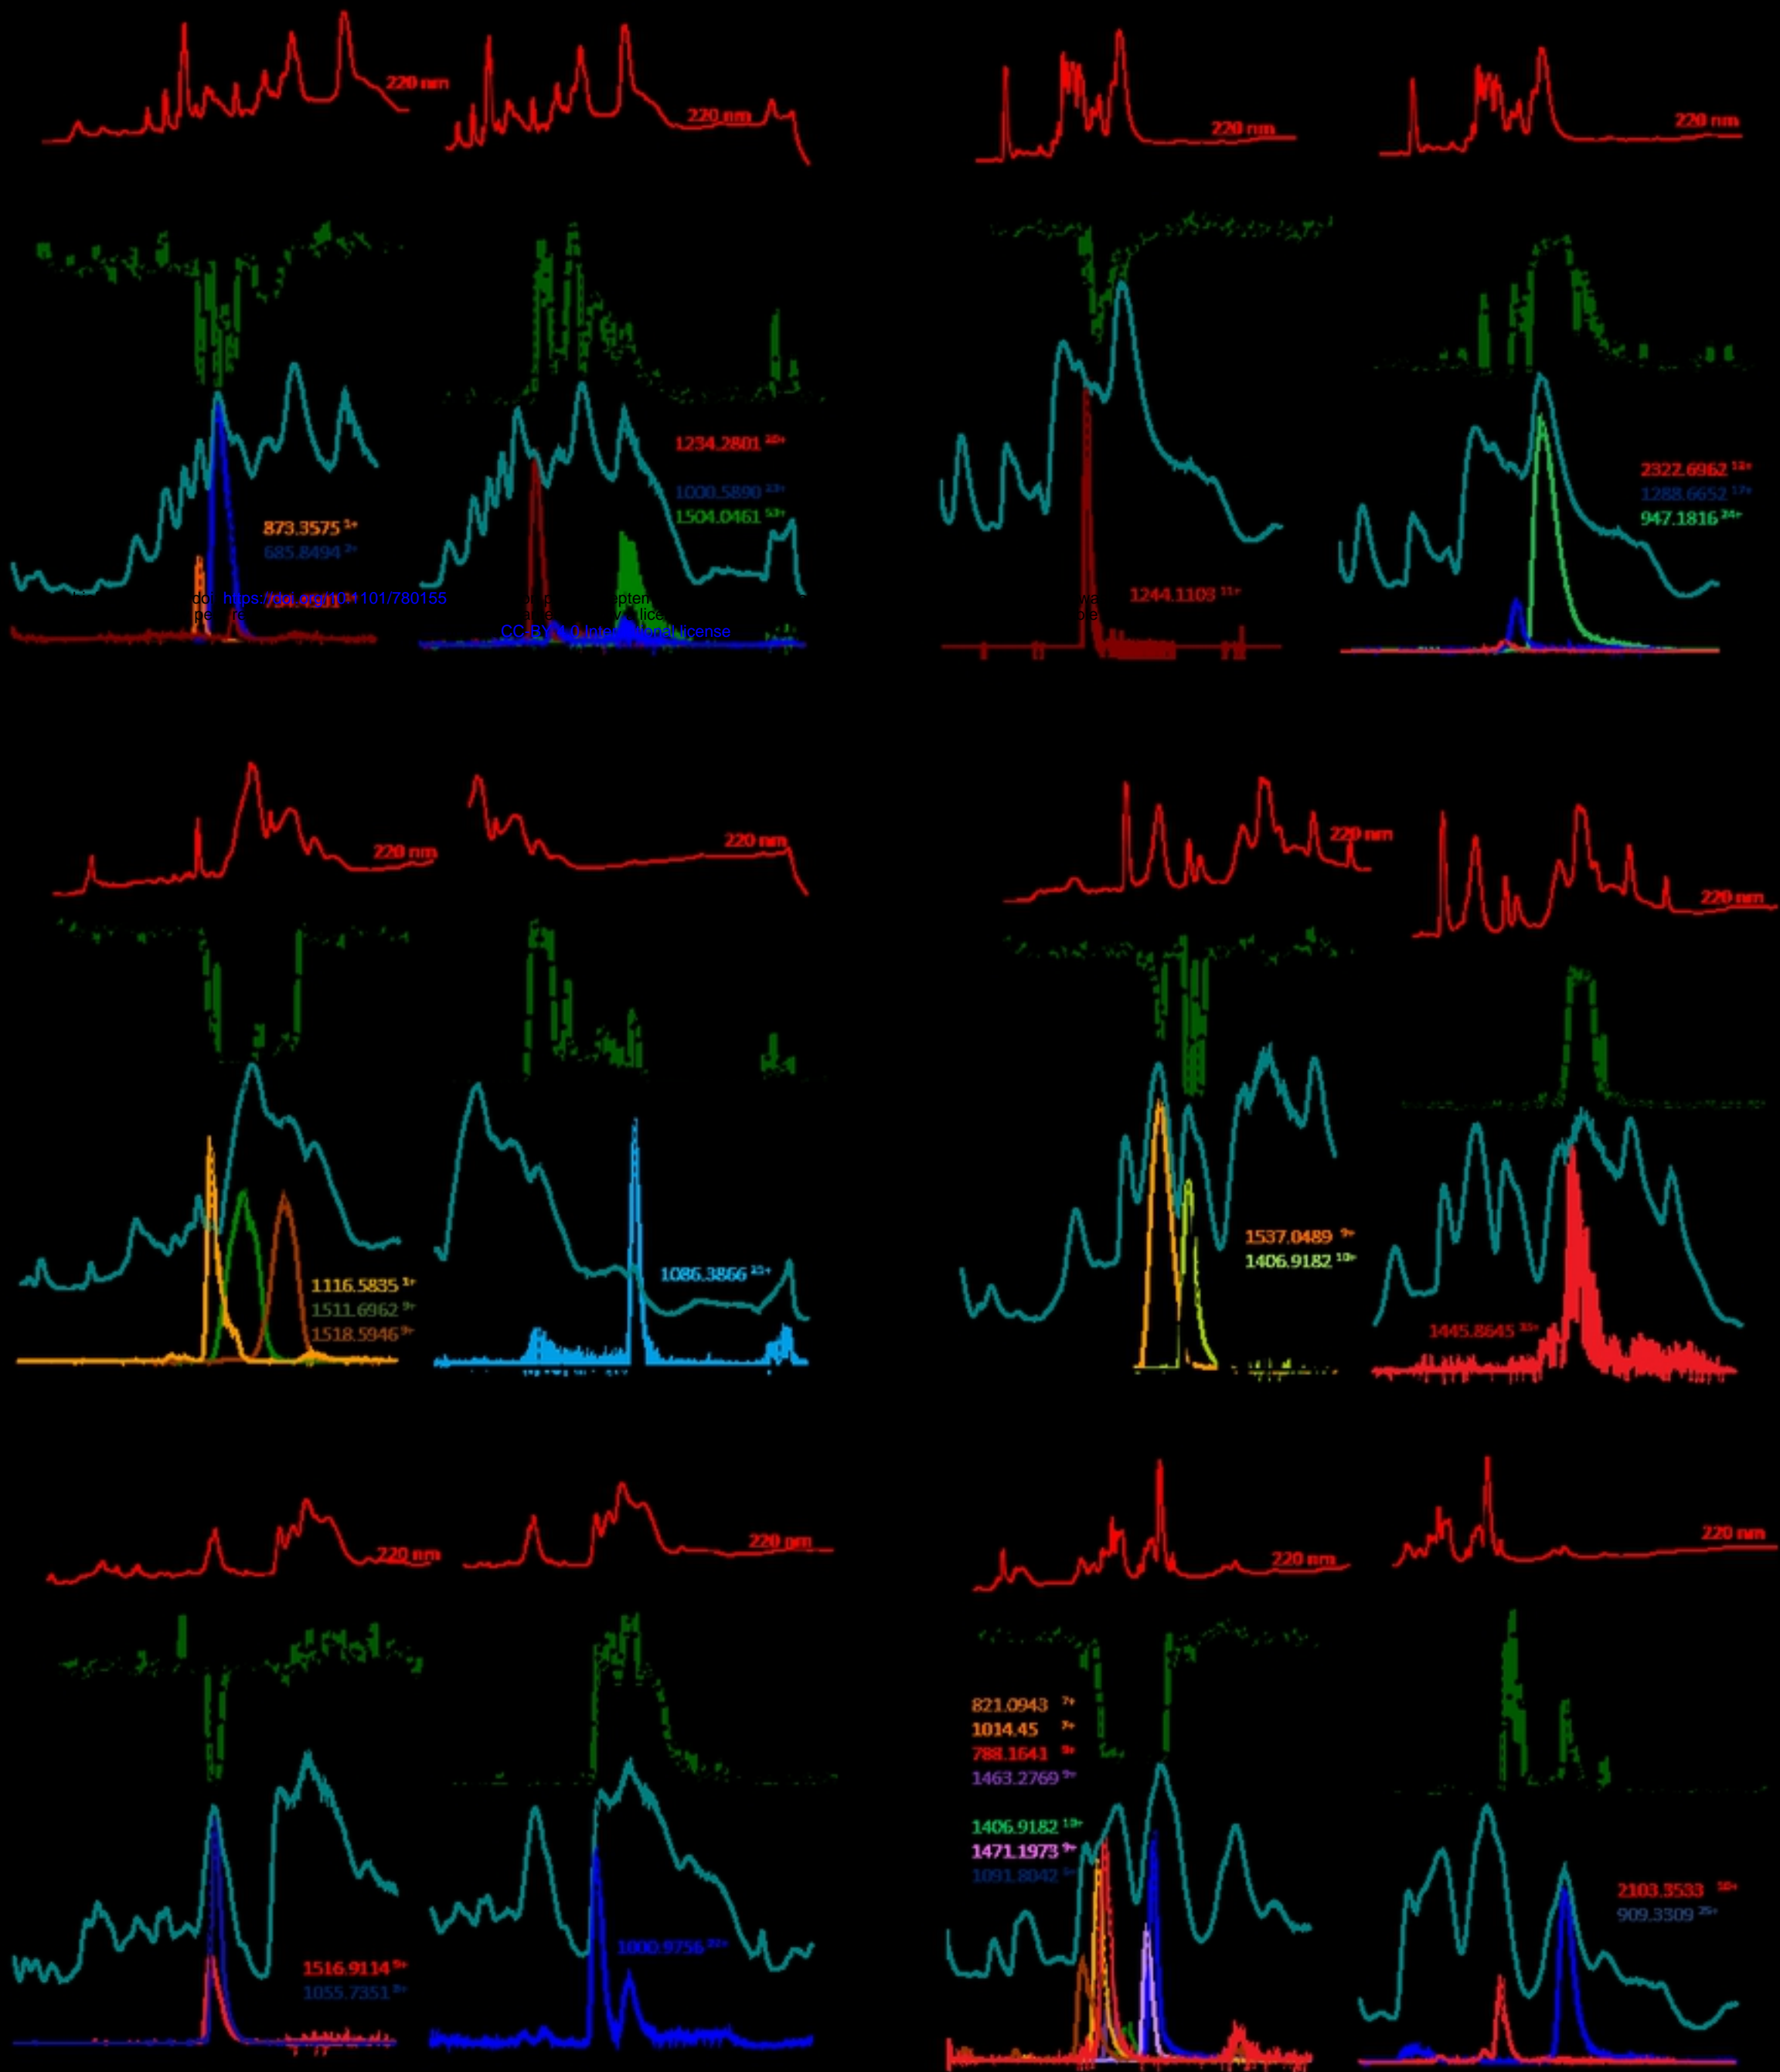

Figure

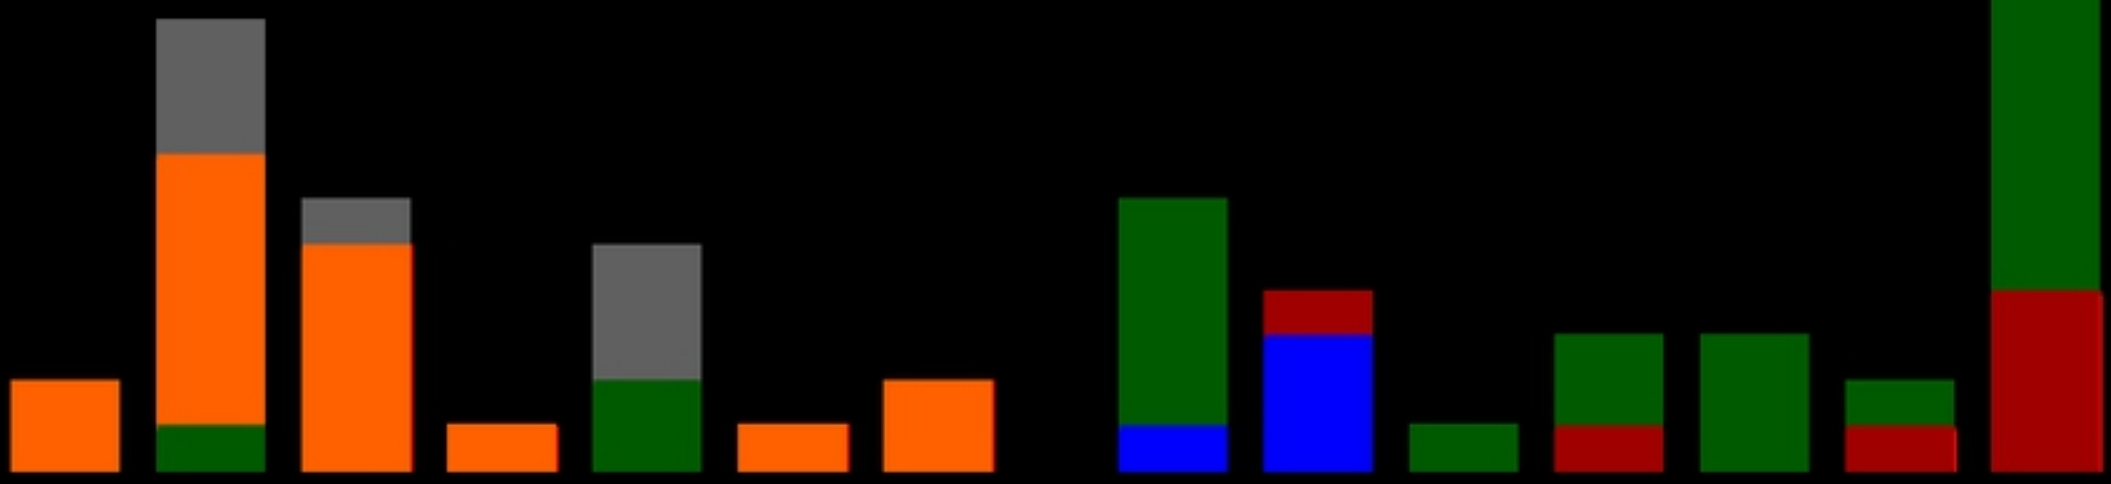

<https://doi.org/10.1101/780155>

CC-BY 4.0 International license

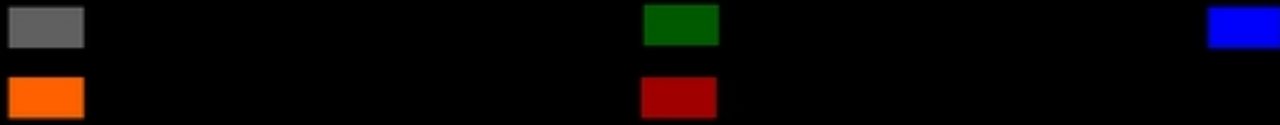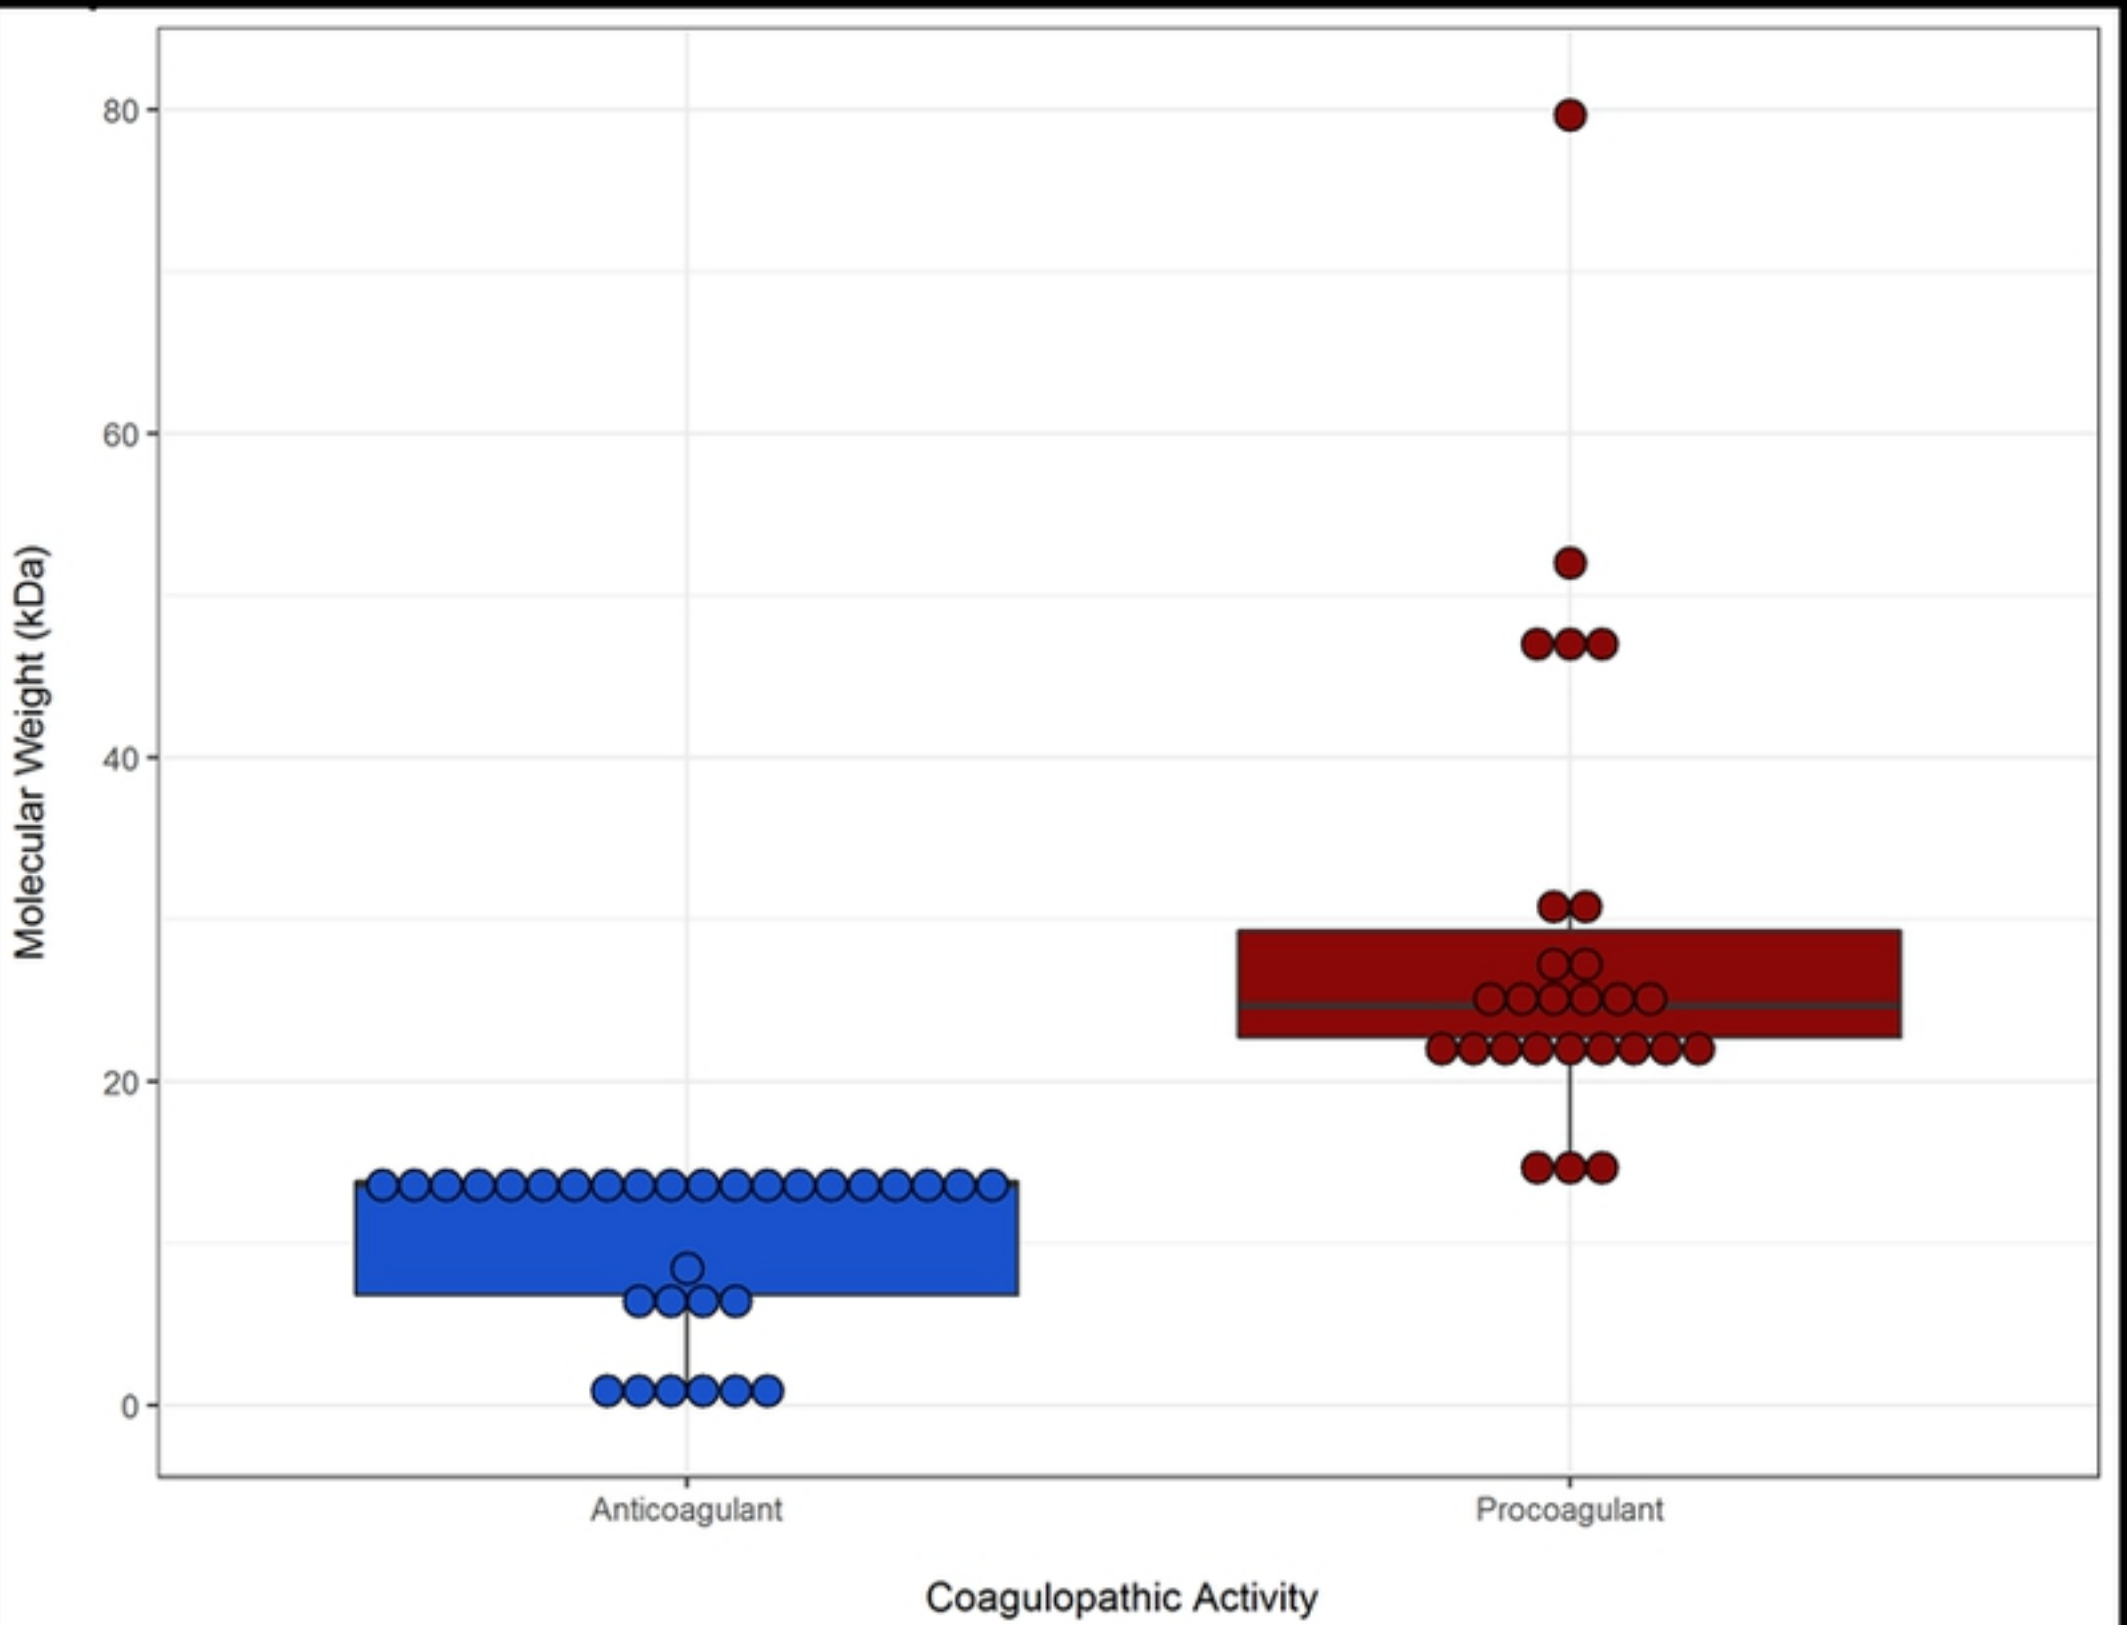

Figure

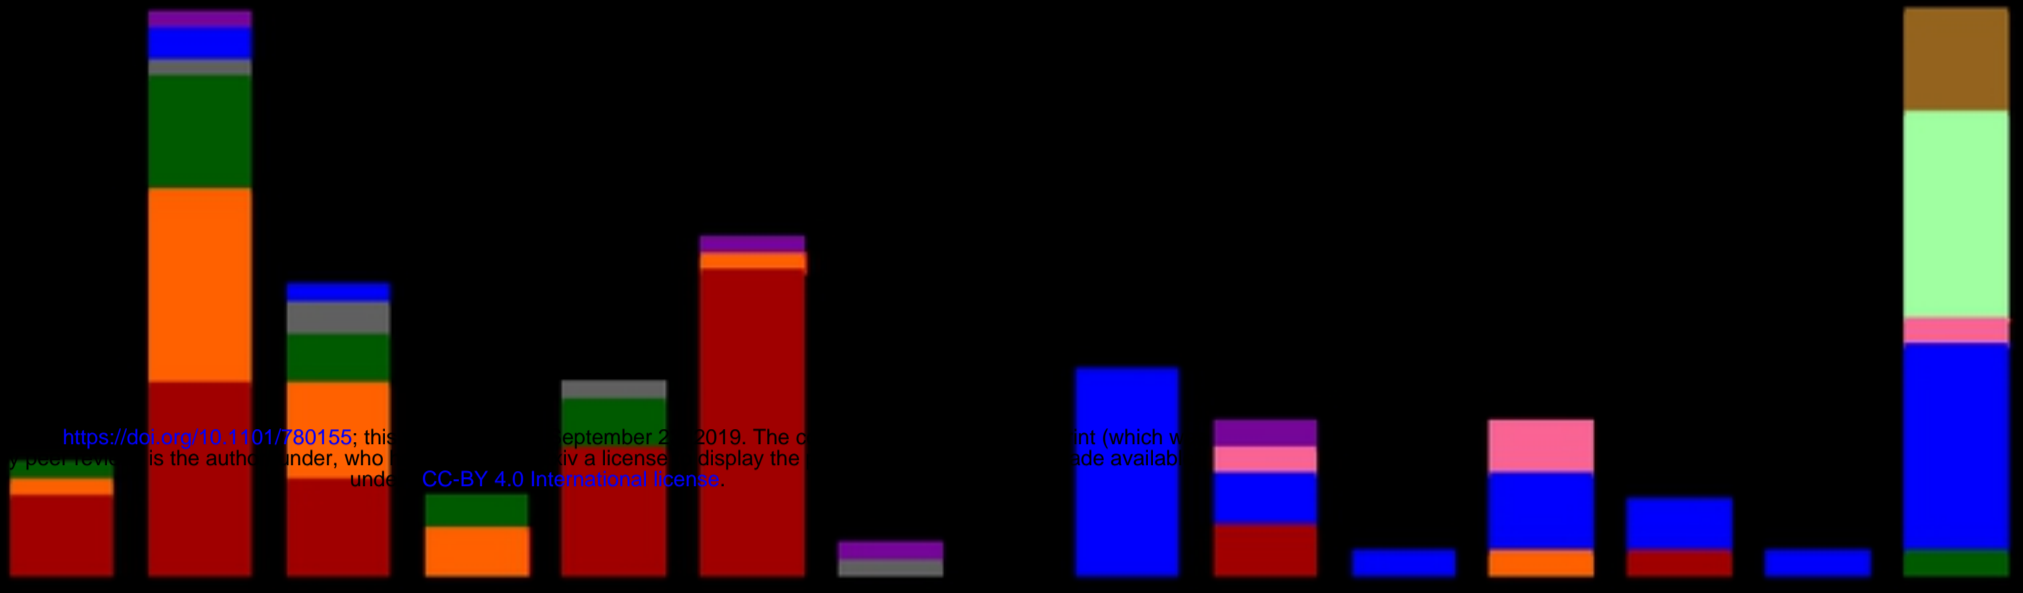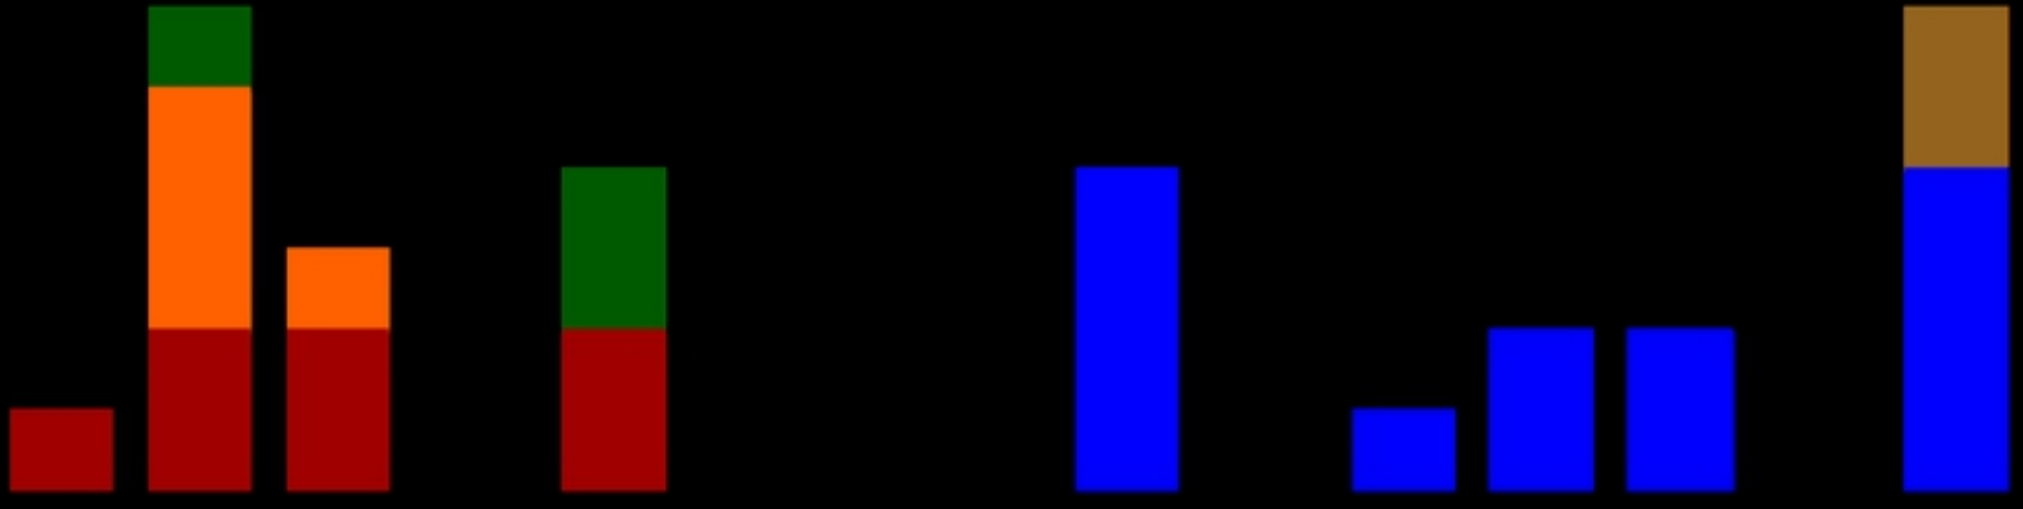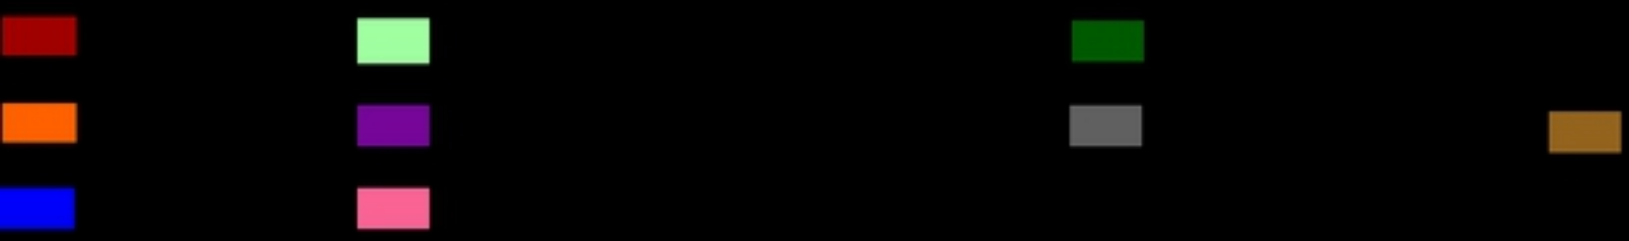

Figure
